# REV7/FANCV Binds to CHAMP1 and Promotes Homologous Recombination Repair

Feng Li, Prabha Sarangi, Hanrong Feng, Lisa Moreau, Huy Nguyen, Connor Clairmont, Alan D. D'Andrea

1. Department of Radiation Oncology, Dana-Farber Cancer Institute, Boston, MA, 02215, USA
2. Center for DNA Damage and Repair, Dana-Farber Cancer Institute, Boston, MA, 02215, USA

Corresponding Author:

Alan D. D'Andrea, M.D.  
Director: Center for DNA Damage and Repair  
The Fuller-American Cancer Society Professor  
Harvard Medical School  
Chief, Division of Genomic Stability and DNA Repair  
Department of Radiation Oncology  
Dana-Farber Cancer Institute, HIM 243  
450 Brookline Ave.  
Boston, MA 02215  
617-632-2080  
FAX: 617-632-6069  
Alan\_Dandrea@dfci.harvard.edu

Running Title: REV7/CHAMP1 promotes Homologous Recombination

Keywords: REV7, TRIP13, CHAMP1, Homologous Recombination, Fanconi Anemia

45 **A critical determinant of DNA repair pathway choice is the HORMA protein REV7, a**  
46 **small abundant adaptor which binds to various DNA repair proteins through its C-**  
47 **terminal seatbelt domain. The REV7 seatbelt binds to the REV3 polymerase to form the**  
48 **Polymerase  $\zeta$  complex, a positive regulator of translesion synthesis (TLS) repair.**  
49 **Alternatively, the REV7 seatbelt binds to SHLD3 in the Shieldin complex, a positive**  
50 **regulator of NHEJ repair. Recent studies have identified another novel REV7 seatbelt-**  
51 **binding protein, CHAMP1 (Chromosome Alignment-Maintaining Phosphoprotein, though**  
52 **its role in DNA repair is unknown. Here, we show that the REV7-CHAMP1 complex**  
53 **promotes homologous recombination (HR) repair by sequestering REV7 from the Shieldin**  
54 **complex. CHAMP1 competes directly with the SHLD3 subunit of the Shieldin complex for**  
55 **a limited pool of C-REV7, thereby inhibiting the REV7-mediated recruitment of the**  
56 **SHLD2 and SHLD1 effector subunits to DNA double strand breaks. CHAMP1 thereby**  
57 **channels DNA repair away from error-prone NHEJ and towards the competing error-free**  
58 **HR pathway. Similarly, CHAMP1 competes with the REV3 component of the POL $\zeta$**   
59 **complex, thereby reducing the level of mutagenic TLS repair. CHAMP1 interacts with**  
60 **POGZ in a heterochromatin complex further promoting HR repair. Importantly, in**  
61 **human tumors, CHAMP1 overexpression promotes HR, confers PARP inhibitor resistance,**  
62 **and correlates with poor prognosis. Thus, by binding to either REV3, SHLD3, or**  
63 **CHAMP1 through its seatbelt, the REV7 protein can promote either TLS repair, NHEJ**  
64 **repair, or HR repair respectively.**

65

66

## 67 INTRODUCTION

68 REV7 (also known as MAD2L2, MAD2B, or FANCV), is a highly-conserved member of  
69 the HORMA family of proteins, named for its three founding members: HOp1, a meiotic  
70 chromosome axis factor, REV7, and MAD2, a spindle assembly checkpoint protein (Clairmont  
71 and D'Andrea, 2021; de Krijger et al., 2021a). REV7 is an abundant cellular protein and is  
72 unique among HORMA proteins, both in its large number of binding partners and in its  
73 involvement in multiple distinct pathways. Germline biallelic mutations in the REV7 gene can  
74 cause the inherited chromosome instability syndrome, Fanconi Anemia (Bluteau et al., 2016).  
75 REV7 adopts the two classic closed and open seatbelt conformations of HORMA proteins, and  
76 SHLD3 and REV3 are among its seatbelt dependent binding partners (Clairmont et al., 2020).

77 REV7 is an important determinant of DNA repair pathway choice (Clairmont and  
78 D'Andrea, 2021). When closed REV7 (c-REV7) binds to SHLD3, this interaction promotes the  
79 assembly of the Shieldin complex (Findlay et al., 2018; Ghezraoui et al., 2018; Gupta et al.,  
80 2018; Tomida et al., 2018). The Shieldin complex in turns blocks DSB end resection, promotes  
81 reblunting of the resected DSBs, and promotes NHEJ (Dev et al., 2018; Gao et al., 2018; Mirman  
82 et al., 2018; Noordermeer et al., 2018). When c-REV7 binds to REV3 in the POL $\zeta$  complex, the  
83 interaction promotes error-prone Translesion Synthesis (TLS) Repair.

84 The AAA+ ATPase, TRIP13, along with its substrate adaptor p31<sup>comet</sup>, can open REV7  
85 and release SHLD3 or REV3 (Clairmont et al., 2020; Sarangi et al., 2020). Similarly, TRIP13  
86 and p31<sup>comet</sup> are known to open other HORMA proteins, such as MAD2 (Brulotte et al., 2017;  
87 Miniowitz-Shemtov et al., 2015; Ye et al., 2015). The mechanism by which REV7 is converted  
88 from the inactive open conformation back to the active closed form is less well understood, and

89 it may involve either the binding of another, unknown SBM-containing protein or a new post-  
90 translational modification.

91 REV7 has at least one additional demonstrated seatbelt-binding partner, CHAMP1 (also  
92 known as C13orf80, CAMP, or ZNF828). CHAMP1 is a little-known but highly conserved zinc  
93 finger protein first identified as a REV7 interactor (Itoh et al., 2011). CHAMP1 localizes to  
94 chromosomes, recruits REV7 to spindles, and plays a role in kinetochore-microtubule  
95 interactions. Disruption of CHAMP1 leads to characteristic defects in chromosome alignment in  
96 mitosis. Germline heterozygous mutations in CHAMP1 are associated with a rare syndromic  
97 form of intellectual disability in humans (Isidor et al., 2016). Crystallographic analysis of the  
98 REV7/CHAMP1 complex (Hara et al., 2017) revealed a strong similarity to the REV7/REV3 and  
99 REV7/SHLD3 interaction surface (Hara et al., 2010). Despite the clear role of REV7 in DNA  
100 repair pathway choice, little is known about the role of its interactor CHAMP1 in DNA repair.

101 Here, we demonstrate that the interaction of REV7 and CHAMP1 is required for DSB  
102 end resection and error-free HR repair. CHAMP1 binds directly to the seatbelt domain of REV7  
103 and thereby competes with the binding of SHLD3 and REV3. DNA damage and the ATM  
104 kinase promote the closing of the REV7 seatbelt, resulting in the increased interaction of REV7  
105 with all three binding partners. High cellular levels of CHAMP1 protein favor HR repair over  
106 NHEJ and TLS and are often observed in human tumors with acquired HR proficiency.  
107 Moreover, CHAMP1 is the active component of a large, multisubunit heterochromatin complex  
108 containing HP1 $\alpha$ , LEDGF, HDGFRP2, and POGZ previously shown to promote HR activity  
109 (Baude et al., 2016; Clairmont et al., 2020; Daugaard et al., 2012; Nozawa et al., 2010;  
110 Vermeulen et al., 2010). One function of this complex is to sequester REV7 away from other

111 error-prone repair pathways, under specific cellular conditions and at specific regions of the  
112 genome.

113

114

## 115 **RESULTS**

### 116 **REV7/CHAMP1 Complex promotes Homologous Recombination Repair**

117 In order to determine the possible involvement of CHAMP1 in DNA repair, we knocked  
118 down CHAMP1 expression with siRNA in U2OS cells (**Figure 1**). Interestingly, CHAMP1  
119 knockdown resulted in a reduction in HR activity, based on the decrease in GFP fluorescence  
120 generated by the DR-GFP template versus the EJ5-GFP template (Pierce et al., 1999; Stark et al.,  
121 2004) (**Figure 1A, B** and **Figure S1A**). Since an early step in HR repair is double strand break  
122 (DSB) end resection (Symington, 2014), we used the SMART assay (Huertas and Cruz-Garcia,  
123 2018) to quantify resection. Indeed, two siRNAs to CHAMP1 decreased DSB end-resection  
124 (**Figure 1C**). Cells with an HR deficiency have a defect in RAD51 foci assembly and exhibit  
125 sensitivity to PARP inhibitors (Bryant et al., 2005; Farmer et al., 2005). Accordingly, RPE-1  
126 cells or U2OS cells with a CRISPR-Cas9-mediated knockout of CHAMP1 exhibited reduced  
127 RAD51 foci (**Figure 1D**) and were sensitive to the PARP inhibitor, olaparib (**Figure 1E, F** and  
128 **Figure S1B-D**). Previous studies have demonstrated that CHAMP1 interacts directly with  
129 REV7 (Hara et al., 2017), a known regulator of DNA HR repair (Boersma et al., 2015; Xu et al.,  
130 2015). To confirm and extend these findings, we showed that DNA damage with high dose UV  
131 radiation activates the binding of CHAMP1 and REV7 and stimulates the colocalization of  
132 REV7 and CHAMP1 in nuclear foci (**Figure S1E-G**). Moreover, CHAMP1 promotes the

133 chromatin localization of REV7 (**Figure S1H, I**). Taken together, we reasoned that the DNA  
134 damage inducible interaction of CHAMP1 and REV7 might be required for HR repair.

135

### 136 **DNA damage activates REV7 seatbelt closure and partner protein binding**

137 We next determined the mechanism by which DNA damage activates the closing of the  
138 REV7 seatbelt (**Figure 2**). REV7 has a single, highly-conserved TQ site (T103) which is a  
139 possible site of DNA damage-inducible, ATM-dependent phosphorylation (**Figure S2A**)  
140 (Matsuoka et al., 2007). Interestingly, this TQ site aligns with a negatively-charged amino acid  
141 (E105) in the primary sequence of another HORMA protein, MAD2. Moreover, in the closed  
142 conformation of MAD2, an electrostatic interaction between E105 and the positively-charged  
143 K192, likely contributes to the closing of the MAD2 seatbelt (**Figure S2B**). Similarly, REV7  
144 has a K198 residue at the corresponding site. We therefore reasoned that a DNA-damage  
145 inducible, ATM-dependent, phosphorylation of T103 of REV7 could account, at least in part, for  
146 the DNA-damage inducible closing of REV7 and the binding of proteins with a SBM, such as  
147 SHLD3, REV3, and CHAMP1. To test this hypothesis, we initially determined whether DNA  
148 damage activates the phosphorylation of REV7 at T103, using an anti-p(S/T)Q antibody (**Figure**  
149 **S2C**). Indeed, DNA damage activated the phosphorylation of REV7, and a point mutation of  
150 REV7 (T103A) reduced this UV-activated phosphorylation of REV7 *in vitro* (**Figure 2A**) and its  
151 chromatin recruitment (**Figure 2B**). Consistent with this, an ATM inhibitor reduced the DNA  
152 damage-dependent phosphorylation of REV7, reduced the chromatin recruitment of REV7, and  
153 decreased the assembly of REV7 foci (**Figure 2C, D** and **Figure S2D, E**). Similarly, UV  
154 damage failed to activate the assembly of nuclear foci of the REV7-T103A mutant protein,  
155 confirming that REV7 closing correlates with nuclear foci formation (**Figure S2F**). Unlike wild-

156 type REV7, the REV7-T103A mutant protein failed to reduce RAD51 foci (**Figure S2G, H**) and  
157 failed to restore PARP inhibitor sensitivity in REV7(-/-) cells (**Figure S2I, J**). Moreover,  
158 knockdown of TRIP13 or p31 resulted in increased binding of CHAMP1 to REV7, while  
159 overexpression of TRIP13 reduced this interaction, similarly to our previous findings with the  
160 other seatbelt interactors SHLD3 and REV3 (**Figure 2E, F**). The REV7-T103A mutant  
161 exhibited reduced binding to either SHLD3, CHAMP1, or REV3 (**Figure 2G-I**). Taken together,  
162 DNA damage activates the ATM-dependent phosphorylation of T103 on REV7, thereby  
163 promoting the closing of the REV7 seatbelt and the binding of SBM proteins, such as SHLD3  
164 and CHAMP1. The TRIP13/p31 complex opens REV7 and releases these binding partners.

165

#### 166 **CHAMP1 increases HR activity by competing with SHLD3 for binding to REV7**

167 REV7 is an abundant cellular protein, and it has several known binding partners (Noordermeer et  
168 al., 2018). Some of these binding partners bind to the C-terminal seatbelt domain of REV7,  
169 including SHLD3, REV3, and CHAMP1 (Clairmont and D'Andrea, 2021; de Krijger et al.,  
170 2021a). We reasoned that these partners might compete for seatbelt binding under different  
171 cellular conditions or cell cycle stages. The REV7 seatbelt binding protein, SHLD3, promotes  
172 the assembly of the Shieldin Complex (Dev et al., 2018; Ghezraoui et al., 2018; Gupta et al.,  
173 2018; Noordermeer et al., 2018), thereby blocking the resection of DSBs, recruiting the  
174 CST/Pol $\alpha$  complex (Barazas et al., 2018; Mirman et al., 2018), and promoting blunt end ligation  
175 via the NHEJ pathway. The TRIP13 ATPase, along with its binding partner p31<sup>comet</sup>, opens the  
176 seatbelt of REV7 and releases SHLD3 (Clairmont et al., 2020; Sarangi et al., 2020).

177 As CHAMP1 is much more abundant in cells than SHLD3 (**Figure S3A**), we determined  
178 whether CHAMP1 regulates REV7 binding to SHLD3. In HEK293T cells, GFP-SHLD3 binds

179 to REV7, and siRNA knockdown of CHAMP1 resulted in increased co-immunoprecipitation of  
180 these proteins, demonstrating that CHAMP1 functions as a negative regulator of the Shieldin  
181 complex (**Figure 3A, B**). The REV7 seatbelt also binds to REV3, and the REV7/REV3 (POL $\zeta$ )  
182 complex promotes error-prone Translesion DNA Synthesis (TLS) and enhanced point  
183 mutagenesis. We reasoned that CHAMP1 might also sequester REV7 from the REV7/REV3  
184 complex and reduce error-prone TLS activity. To test this hypothesis, we generated and  
185 expressed a GFP fusion protein containing the seatbelt binding domain of REV3. As predicted,  
186 knocking out CHAMP1 resulted in an increased binding of the TLS polymerase subunit REV3 to  
187 REV7 in U2OS cells (**Figure 3C, D**). Consistent with this result, CRISPR-Cas9-mediated  
188 knockout of CHAMP1 in U2OS cells or RPE-1 cells resulted in increased REV7/REV3 activity,  
189 as measured by MMC resistance and reduced MMC-induced chromosome radials (**Figure 3E, F**)  
190 and **Figure S3B-D**). The TRIP13/p31 complex promotes the ATP-dependent opening of the  
191 REV7/SHLD3 complex and releases SHLD3 (Clairmont et al., 2020). Taken together, these  
192 results support a mechanism in which CHAMP1 promotes DSB end resection by sequestering  
193 REV7 from SHLD3 and preventing the assembly of the Shieldin complex.

194

### 195 **The REV7 binding activity of CHAMP1 is required for HR repair but not for proper** 196 **chromosome alignment**

197 In its primary sequence, CHAMP1 has non-overlapping N-ZNF (C2H2-Zn finger  
198 domains), SPE (PxxSPExxK motifs), WK (SPxxWKxxP motifs), FPE (FPExxK motifs), and C-  
199 ZNF regions (Itoh et al., 2011) (**Figure 4A**). While the CHAMP1-WK region is required for  
200 REV7 binding and recruitment of REV7 to spindles, the CHAMP1-FPE region appears to play  
201 an independent role in chromosome alignment (Itoh et al., 2011). To confirm and extend these



202 results, we generated two mutant forms of CHAMP1. According to the molecular structure of  
203 the REV7/CHAMP1 complex (Hara et al., 2017), the WKPAKPAPS - motif of CHAMP1,  
204 corresponding to the known consensus of a REV7 Seatbelt Binding Motif (SBM), interacts  
205 directly with the seatbelt domain of REV7 (**Figure 4B**), albeit with distinct amino acid residue  
206 interactions compared to the REV7/REV3 or the REV7/SHLD3 interactions. We therefore  
207 generated a mutant form of CHAMP1 which is predicted to disrupt this REV7 binding  
208 interaction (ie, the W334A/K335A double mutation, referred to as the CHAMP1-2A mutation).  
209 We also generated an in-frame deletion in CHAMP1 (del-FPE CHAMP1), previously shown to  
210 be defective in the rescue of chromosome abnormalities in CHAMP1<sup>-/-</sup> cells (Itoh et al., 2011).

211 As predicted, when expressed in RPE1 CHAMP1<sup>-/-</sup> cells, the CHAMP1-2A mutant  
212 failed to bind to REV7, while the del-FPE CHAMP1 mutant was competent for REV7 binding  
213 (**Figure 4C**). Indeed, the CHAMP1-2A mutant failed to correct the PARPi sensitivity of in  
214 CHAMP1<sup>-/-</sup> cells, further confirming that REV7 binding and sequestration by CHAMP1 is  
215 required for enhancement of HR activity (**Figure 4D**). The failure of CHAMP1-2A to restore  
216 PARP inhibitor resistance and to increase MMC sensitivity was confirmed in the U2OS wild-  
217 type or CHAMP1<sup>-/-</sup> cells (**Figure S4A-E**). Interestingly, complementation with the CHAMP1  
218 del-FPE mutant yielded PARPi resistance, indicating that the FPE domain is not required for  
219 enhancement of HR activity.

220 We next evaluated these two mutant proteins for their ability to correct chromosome  
221 misalignment in CHAMP1<sup>-/-</sup> cells. Consistent with a previous report (Itoh et al., 2011),  
222 CRISPR-knockout of CHAMP1 in RPE1 cells results in a severe defect in chromosome  
223 alignment (**Figure S4F, G**). The CHAMP1 del-FPE mutant protein failed to complement the  
224 chromosome misalignment and the G2/M accumulation of the CHAMP1<sup>-/-</sup> cells, but the WT

225 CHAMP1 protein or the CHAMP1-2A mutant were functional in these assays (**Figure 4E, F**).  
226 Taken together, the WK and FPE domains of CHAMP1 have independent, non-overlapping  
227 functions. Moreover, REV7 binding to CHAMP1 is required for HR activity; however, the  
228 CHAMP1-mediated recruitment of REV7 to the spindle is not required for the correction of  
229 chromosome alignment.

230

### 231 **CHAMP1 regulates homologous recombination through REV7**

232 CHAMP1 therefore regulates HR activity through its ability to sequester REV7 from the  
233 Shieldin complex. Thus, we expect that eliminating CHAMP1 in cells already lacking REV7  
234 should not affect HR (**Figure 5**). HR activity can be scored by measuring the level of RAD51  
235 foci or pRPA foci, both known to be increased in the setting of HR. As predicted siRNA  
236 knockdown of CHAMP1 in wild-type RPE1 cells reduced the HR activity but failed to reduce  
237 the HR activity in cells in which REV7 was already knocked out (**Figure 5A-D**). The REV7<sup>-/-</sup>  
238 cells exhibited increased HR activity, as measured by PARP inhibitor resistance (**Figure 5E**),  
239 regardless of their CHAMP1 expression level. Consistent with these results, knockdown of  
240 CHAMP1 in a SHLD2-deficient cell line, HCC1937, also failed to cause Olaparib sensitivity  
241 (**Figure S5A**).

242 To further validate this model, we next sought clinical evidence that CHAMP1  
243 expression might affect cancer patient survival (**Figure S5B, C**). We reasoned that human  
244 tumors with an underlying defect in an HR pathway might upregulate CHAMP1 as a  
245 compensatory mechanism to tolerate their low HR and their replication stress. To test this  
246 hypothesis, we correlated the level of CHAMP1 expression in ovarian tumors with patient  
247 survival. For patients with tumors with low REV7 expression, the level of expression of

248 CHAMP1 did not affect survival (**Figure S5B**). Thus, consistent with the cellular data, the  
249 elevated HR activity in cells with low or absent REV7 expression was unaffected by CHAMP1  
250 expression levels. Interestingly, for patients with tumors with high REV7 expression, the level  
251 of CHAMP1 expression significantly affected patient survival (**Figure S5C**). The high  
252 CHAMP1 expression correlated with a more aggressive tumor and poor patient prognosis,  
253 perhaps resulting from the improved HR activity of these tumors. Taken together, the ability of  
254 CHAMP1 to enhance HR is directly dependent on the presence of the REV7 protein.

255

256 **CHAMP1 overexpression is common in tumors with underlying HR deficiency and**  
257 **correlates with poor cancer patient prognosis**

258 We next sought additional evidence that CHAMP1 upregulation correlates with PARP  
259 inhibitor resistance. We used a panel of BRCA1-deficient cell lines with acquired PARPi-  
260 resistance, collected through serial selection in increasing concentrations of PARPi (**Figure 6A**)  
261 (Farkkila et al., 2021). These cells exhibited multiple independent mechanisms of PARPi  
262 resistance, including downregulation of the Shieldin Complex or upregulation of ATR/CHK1  
263 pathway activity (Farkkila et al., 2021). Interestingly, one of these PARPi-resistant clones  
264 (NA5) exhibited high CHAMP1 protein expression compared to the parental PARPi-sensitive  
265 cell line (**Figure S6A**). Knockdown of CHAMP1 in these cells restored PARPi sensitivity  
266 (**Figure 6B**). In contrast, knockdown of CHAMP1 in another line (NA1), which has a lower  
267 level of CHAMP1, did not restore PARPi sensitivity. Taken together, *BRCA1*-deficient cells can  
268 acquire PARPi resistance, at least in part, by upregulating CHAMP1 expression.

269 Additional analysis of clinical databases revealed that, for patients with HR deficient  
270 tumors containing a BRCA1 or BRCA2 mutation, a high level of CHAMP1 expression correlates

271 with a worse prognosis (**Figure 6C, D**). This result further suggests that high CHAMP1  
272 expression can partially correct the HR deficiency of these tumors, leading to a more aggressive  
273 tumor phenotype. Tumors with BRCA2 mutations and presumably HR deficiency exhibited  
274 higher baseline levels of CHAMP1 mRNA expression (**Figure S6B**). Consistent with these  
275 observations, the level of CHAMP1 mRNA expression in cancer cell lines strongly correlates  
276 with the level of CCNE1 mRNA expression (**Figure 6E**). Cells with a high degree of replication  
277 stress resulting from CCNE1 amplification may therefore rely on CHAMP1-mediated HR for  
278 their survival. Indeed, breast cancer cell lines with high expression of CCNE1 mRNA are more  
279 dependent on CHAMP1 for their proliferation and survival (**Figure 6F**).

280

### 281 **POGZ binds to CHAMP1 and cooperates in HR Repair**

282 Recent studies have shown that CHAMP1 is a subunit of a large multisubunit complex of  
283 HP1 $\alpha$  heterochromatin binding proteins. This complex includes HP1 $\alpha$ , POGZ, LEDGF, and  
284 HDGFRP2 (Baude et al., 2016; Clairmont et al., 2020; Daugaard et al., 2012; Nozawa et al.,  
285 2010; Vermeulen et al., 2010). REV7 coimmunoprecipitates with multiple components of this  
286 complex (Noordermeer et al., 2018), further suggesting a functional link with DNA repair  
287 regulation. Interestingly, knockdown or knockout of many of the subunits of this complex, such  
288 as HP1 $\alpha$  (Soria and Almouzni, 2013), LEDGF (Daugaard et al., 2012) or HDGFRP2 (Baude et  
289 al., 2016), similar to the knockdown of CHAMP1, reduces DSB end resection and HR and  
290 increases PARP inhibitor sensitivity (Olivieri et al., 2020). To confirm and extend these studies,  
291 we next evaluated the POGZ subunit of this complex. Knockout of POGZ in RPE cells, like  
292 knockout of CHAMP1, resulted in decreased HR repair, decreased DSB end resection, decreased  
293 RAD51 foci, and increased PARP inhibitor sensitivity (**Figure 7A-C and Figure S7A,B**).

294 Moreover, IR-induced DNA damage activated the co-immunoprecipitation of POGZ and  
295 CHAMP1 (**Figure 7D**). Knockdown of POGZ reduced the interaction of REV7 and CHAMP1  
296 (**Figure 7E**), and POGZ binding to CHAMP1 was independent of REV7 seatbelt binding  
297 (**Figure S7C**). Importantly, knockdown of POGZ in CHAMP1(-/-) cells or knockdown CHAMP1  
298 in POGZ(-/-) cells resulted in no additional impairment of HR repair or PARP inhibitor  
299 sensitivity (**Figure 7F, G**), demonstrating that POGZ and CHAMP1 are epistatic in HR repair.  
300 Finally, POGZ expression, like CHAMP1 expression, is increased in many human cancers,  
301 consistent with its compensatory role in promoting HR repair (**Figure S7D**). Taken together,  
302 these results demonstrate that a CHAMP1-containing multisubunit complex has a functional role  
303 in sequestering REV7, preventing its association with SHLD3 in the Shieldin complex, and  
304 promoting HR repair locally in heterochromatin.

305

306

## 307 **DISCUSSION**

308 Our results demonstrate that REV7, through its C-terminal seatbelt, can bind to three  
309 different factors, SHLD3, REV3, and CHAMP1, to elicit distinct DNA repair outcomes. The  
310 REV7-SHLD3 interaction mediates the assembly and accrual of the Shieldin complex at DSBs to  
311 block DSB end resection and channel repair through NHEJ. The REV7-REV3 interaction  
312 promotes the Pol $\zeta$  Translesion Synthesis (TLS) complex through its interaction with REV1, and  
313 this complex bypasses bulky adducts of DNA during replication, thereby promoting mutagenesis.  
314 Finally, the REV7-CHAMP1 complex, by sequestering REV7 from REV7-SHLD3 and REV7-  
315 REV3 complexes, can promote error-free HR repair and function as a negative regulator of the  
316 error-prone NHEJ and TLS repair pathways, respectively. Of the three binding proteins,

317 CHAMP1 is the most abundant, resulting in a trend toward error-free DNA repair. The  
318 mechanisms by which cells switch from one REV7 binding complex to another is largely  
319 unknown.

320 Although CHAMP1 may have additional, independent roles in HR repair, its  
321 sequestration of REV7 appears to be its primary mechanism in HR activity. Indeed, cells with a  
322 knockout of REV7, versus cells with a double knockout of REV7 and CHAMP1, have equally  
323 high levels of DSB end resection, RAD51 foci, and PARP inhibitor resistance. These results  
324 argue for an epistatic relationship of REV7 and CHAMP1 in HR repair.

325 Previous studies indicate that TRIP13/p31<sup>comet</sup> complex opens REV7 and, like CHAMP1,  
326 also reduces the Shieldin complex and promotes DSB end resection and HR repair (Clairmont et  
327 al., 2020; de Krijger et al., 2021b). TRIP13 and CHAMP1 appear to be non-epistatic in HR  
328 repair, however, since knockdown of TRIP13 in CHAMP1 (-/-) cells results in a further decline  
329 in HR repair. Accordingly, a reduction in REV7/SHLD3 levels, by either TRIP13/p31<sup>comet</sup> or  
330 CHAMP expression, appears to result from independent mechanisms for upregulating HR repair.

331 We have shown that DNA damage following ionizing radiation activates the ATM-  
332 dependent closing of REV7 and the interaction of REV7 with either SHLD3, REV3, or  
333 CHAMP1. How and when REV7 selectively chooses one binding partner versus another is  
334 mostly unknown. It will be important to determine whether specific kinds of DNA damage will  
335 preferentially activate a specific complex. For instance, IR may preferentially activate the  
336 REV7/SHLD3 complex while replication fork perturbants, like hydroxyurea, may activate the  
337 REV7/CHAMP1 complex. Also, the choice of a specific REV7 complex may be strongly  
338 influenced by either the local organization of the genome, cell cycle cues, or cell type specificity.  
339 The specific interaction of REV7 with SHLD3, REV3, or CHAMP1 may also be determined by

340 the TRIP13/p31<sup>comet</sup> enzyme. While all three complexes are released by TRIP13/p31<sup>comet</sup>, cells  
341 may choose to selectively release one complex or another, depending on specific cellular  
342 demands for NHEJ, TLS, or HR, respectively.

343 In addition to its role in the Shieldin complex and upregulation of NHEJ repair, REV7 is  
344 also a critical determinant of Translesion DNA Synthesis (TLS repair). Indeed, one of the best  
345 known roles of REV7 is its role as the small non-catalytic subunit of the Pol $\zeta$  complex. Pol  $\zeta$  is  
346 one of several human polymerases, specialized for synthesizing DNA across lesions in the  
347 template strand, a process known as translesion synthesis (TLS). TLS is far more mutagenic than  
348 normal replication (Goodman and Woodgate, 2013; Sale, 2013). In particular, DNA POL $\zeta$ , in  
349 conjunction with its partner, REV1, are responsible for the majority of spontaneous and damage  
350 induced mutations during DNA replication (Gibbs et al., 2000; Jansen et al., 2005).

351 Although the mutagenic TLS and NHEJ pathways have historically been viewed as  
352 independent processes, their coordinate regulation by REV7 calls for a reevaluation of this  
353 relationship. Indeed, there are several important relationships between these processes aside from  
354 REV7, and some of these relationships are functional or spatiotemporal. First, in both contexts,  
355 the active REV7/REV3 or REV7/SHLD3 complexes promote the activity of rapid mutagenic  
356 pathways, in contrast with the slower process of HR repair. Second, both TLS and NHEJ can  
357 still play an important role during S-phase when the bulk of DNA repair is carried out HR. Lastly,  
358 resection and the HR pathway are well-known to be utilized at stalled replication forks as well as  
359 DSBs, raising the possibility that REV7/REV3 and REV7/SHLD3 could act on the same  
360 substrate.

361 Finally, additional factors may influence the relative levels of REV7/SHLD3,  
362 REV7/REV3, and REV7/CHAMP1 in the cell. First, REV7 may preferentially bind to

363 CHAMP1 in heterochromatic regions of the genome, such as centromeres and telomeres,  
364 resulting in higher local levels of HR repair. Second, CHAMP1 may also have a distinct  
365 binding affinity for the REV7 seatbelt. Indeed, based on the corresponding crystal structures, the  
366 molecular interactions of the REV7 seatbelt with either CHAMP1 or REV3 are distinct (Hara et  
367 al., 2010; Hara et al., 2017) and likely to result in distinct binding affinities and off rates. Third,  
368 some tumor cells with an underlying genetic deficiency in HR repair, such as a BRCA1 or  
369 BRCA2 mutation, have higher level of expression of CHAMP1. Interestingly, this increase in  
370 CHAMP1 may provide these cells with a compensatory increase in HR and a higher capacity for  
371 tolerating replication stress. Finally, the specific interaction of REV7 with these various binding  
372 partners may be highly regulated by post-translational modifications and under distinct cellular  
373 conditions. Future studies are needed to further assess the spatial and temporal control of the  
374 REV7 interaction with CHAMP1, SHLD3, and REV3.

375

376

## 377 **ACKNOWLEDGMENTS**

378 We thank all members of the D'Andrea laboratory for their helpful suggestions and  
379 comments. This work was supported by grants from the US National Institutes of Health  
380 (R37HL052725 and P01HL048546), the US Department of Defense (BM110181), the Breast  
381 Cancer Research Foundation, the Fanconi Anemia Research Fund, the Ludwig Center at Harvard,  
382 and the Smith Family Foundation (to A.D.D.) and the Claudia Adams Barr Program in  
383 Innovative Basic Cancer Research (to F.L. and P.S).

384

385

## 386 **AUTHOR CONTRIBUTIONS**



387 F.L., C.C., P.S., and A.D.D. conceived the study, analyzed the data, and wrote the manuscript.

388 H.F., L.M, and H.N. performed experiments and analyzed the data.

389

390 **DISCLOSURES**

391 A.D. D'Andrea is a consultant/advisory board member for Lilly Oncology, Merck-EMD Serono,

392 Cyteir Therapeutics, Third Rock Ventures, AstraZeneca, Ideaya Inc., and Cedilla Therapeutics

393 Inc. He is also a stockholder in Ideaya Inc., Cedilla Therapeutics Inc., and Cyteir Therapeutics,

394 and reports receiving commercial research grants from Lilly Oncology and Merck-EMD Serono.

395

396

397 **FIGURE LEGENDS**

398 **Figure 1. CHAMP1 promotes homologous recombination**

399 **A**, Graph showing the percentage of GFP-positive cells after DR-GFP analysis. U2OS cells were  
400 infected with I-SceI adenovirus and knocked down for BRCA1 or CHAMP1 using siRNA. N=3  
401 biologically independent experiments. Error bars indicate standard errors, and p values were  
402 calculated using two-tailed Student t-test, \*\*\*P<0.0001. **B**, Graph showing the percentage of  
403 GFP-positive cells after EJ5-GFP analysis. U2OS cells were infected with I-SceI adenovirus and  
404 knocked down for 53BP1 or CHAMP1 using siRNA. N=3 biologically independent experiments.  
405 Error bars indicate standard errors, and p values were calculated using two-tailed Student t-test,  
406 \*\*\*P<0.0001, \*\*P<0.001, \*P<0.05. **C**, Quantification of resected ssDNA measured by SMART  
407 assay in U2OS cells treated by siControl or siRNAs targeting CHAMP1 for 48hrs.  
408 Approximately 50 fibers were counted per experiment. Error bars indicate standard errors, and p  
409 values were calculated using Student t-test, \*\*\*P<0.0001. **D**, (left) Representative images of  
410 RAD51 foci formation in wild-type and two CHAMP1 knockout U2OS cell lines 6 hours after  
411 5Gy IR treatment. (right) Quantification of >10 RAD51 foci. n=3 biologically independent  
412 experiments. \*\*\*P < 0.001. Statistical analysis was performed using two-tailed student's t-tests.  
413 **E**, 5-day cytotoxicity analysis of wild type and two CHAMP1 knockout RPE1(p53<sup>-/-</sup>) cell lines  
414 treated with various doses of Olaparib; n=3 independent experiments. Wild type versus  
415 CHAMP1-KO#1, \*\*\*P<0.0001; Wild type versus CHAMP1-KO#2, \*\*\*P<0.0001; statistical  
416 analysis was performed using two-way ANOVA. **F**, 3-day cytotoxicity analysis of wild type and  
417 two CHAMP1 knockout U2OS cell lines treated with various doses of Olaparib. Cell viability  
418 were detected by CellTiter-Glo (Promega)n=3 independent experiments. Wild type versus

419 CHAMP1-KO#1, \*\*\*P<0.0001; Wild type versus CHAMP1-KO#2, \*\*\*P<0.0001; statistical  
420 analysis was performed using two-way ANOVA.

421

422 **Figure 2. DNA Damage Activates REV7 seatbelt closure and partner protein binding**

423 **A**, 293T cells were transfected with FLAG-REV7-WT or FLAG-REV7-T103A, and following  
424 treatment with/without UV (20J/m<sup>2</sup>) for 1 hour. The FLAG-immunoprecipitations were detected  
425 by western blot using anti-Flag and anti-p-[S/T]Q antibodies. **B**, 293T cells were transfected with  
426 FLAG-REV7-WT or FLAG-REV7-T103A, and following treatment with/without UV (20J/m<sup>2</sup>)  
427 as indicated. Western blot showing chromatin fraction of FLAG-REV7-WT and FLAG-REV7-  
428 T103A. Histone H3 is used as control for chromatin isolation. **C**, Western blot showing  
429 chromatin fraction of REV7 in U2OS treated with DMSO or ATM inhibitor, following IR  
430 treatment as indicated. **D**, Schematic of our proposed model showing that the conformational  
431 state is regulated by TRIP1-p31 complex and ATM. ATM phosphorylates REV7 at T103 site  
432 and promotes the closed form of REV7. The closed REV7 interacts with CHAMP1, SHLD3 and  
433 REV3. **E**, Western blot showing GFP-immunoprecipitation of GFP-CHAMP1 in wild-type (WT),  
434 *TRIP13*<sup>-/-</sup> and p31<sup>-/-</sup> U2OS cells, and the co-immunoprecipitation of endogenous REV7. **F**,  
435 Western blot showing GFP-immunoprecipitation of GFP-CHAMP1 in U2OS-vector control (VC)  
436 and TRIP13 overexpressed U2OS cells, and the co-immunoprecipitation of endogenous TRIP13  
437 and REV7. **G**, 293T cells were co-transfected with GFP-SHLD3 and Flag-REV7 or Flag-REV7-  
438 T103A. Western blot showing GFP-immunoprecipitation of GFP-SHLD3, and the co-  
439 immunoprecipitation of Flag-REV7 and Flag-REV7-T103A. **H**, Western blot showing Flag-  
440 immunoprecipitation of Flag-REV7 wild type and Flag-REV7-T103A mutant, and the co-  
441 immunoprecipitation of endogenous CHAMP1. **I**, 293T cells were co-transfected with GFP-

442 tagged fragment of REV3 containing the REV7-binding domain (R3BD) and Flag-REV7 or  
443 Flag-REV7-T103A. Western blot showing Flag-immunoprecipitation of Flag-REV7 and Flag-  
444 REV7-T103A, and the co-immunoprecipitation of GFP-R3BD. All of the immunoblots are  
445 representative of at least two independent experiments.

446

447 **Figure 3. CHAMP1 competes with SHLD3 and REV3 for binding to REV7**

448 **A**, Western blot showing GFP-immunoprecipitation of GFP-SHLD3 in 293T cells, treated with  
449 or without siCHAMP1, and the co-immunoprecipitation of endogenous CHAMP1 and REV7. **B**,  
450 Quantification of the relative SHLD3-REV7 binding activity from three independent  
451 immunoprecipitation western blot shown in A. **C**. Western blot showing GFP-  
452 immunoprecipitation of GFP-tagged fragment of REV3 containing the REV7 binding domain  
453 (R3BD) in U2OS wild type and U2OS<sup>CHAMP1<sup>-/-</sup></sup> cells, and the co-immunoprecipitation of  
454 endogenous CHAMP1 and REV7. **D**, Quantification of the relative REV3-REV7 binding activity  
455 from three independent immunoprecipitation western blot shown in C. **E**, A 14 days clonogenic  
456 assay of U2OS wild type and two CHAMP1-KO U2OS cell lines, treated with various doses of  
457 MMC; n=3 independent experiments. \*P<0.05. Statistical analysis was performed using two-way  
458 ANOVA. **F**, A 14 days clonogenic assay of RPE1<sup>p53<sup>-/-</sup></sup> and two RPE1<sup>p53<sup>-/-</sup>CHAMP1<sup>-/-</sup></sup> cell lines,  
459 treated with various doses of MMC; n=3 independent experiments. \*P<0.05. Statistical analysis  
460 was performed using two-way ANOVA.

461

462 **Figure 4. The REV7 binding region of CHAMP1 is required for the HR function but not**  
463 **for correction of chromosome misalignment**

464 **A**, (Top) Schematic of CHAMP1 protein showing its various domains and REV7 binding region.  
465 (Bottom) Schematic of CHAMP1-Full Length (FL) and two mutants (2A and  $\Delta$ FPPE). SBM,  
466 REV7 seatbelt binding motif. **B**, Structure of the REV7-CHAMP1 complex. REV7 is shown in  
467 cyan and blue (seatbelt domain), and the CHAMP1 fragment (residues 331-343) is shown in red.  
468 **C**, Western blot showing GFP-immunoprecipitation of GFP-Empty Vector, GFP-CHAMP1  
469 wild-type, GFP-CHAMP1-2A mutant or GFP-CHAMP1- $\Delta$ FPPE, and the co-immunoprecipitation  
470 of endogenous REV7 in 293T cells. **D**, The RPE1<sup>p53<sup>-/-</sup>-CHAMP1<sup>-/-</sup></sup> cells were transfected with vectors  
471 containing GFP-tagged CHAMP1-Full Length (FL) or mutants cDNA for 48 hours. GFP positive  
472 cells were sorted by Flow Cytometry. A 14 days clonogenic assay of indicated cell lines treated  
473 with various doses of Olaparib; n=3 independent experiments, \*\*P<0.001. Statistical analysis  
474 was performed using two-way ANOVA. **E**, Summary of chromosome misalignment in indicated  
475 cell lines from D. **F**, Same cell lines from D were fixed with 70% ethanol and stained with  
476 propidium iodide. Quantitative analysis of indicated cells in G2/M were shown.

477

## 478 **Figure 5. CHAMP1 regulates HR through REV7**

479 **A**, Representative images of RAD51 foci formation in wild-type and *REV7*<sup>-/-</sup> U2OS cells treated  
480 with siRNA negative control (siNC) and siCHAMP1, and 6 hours after 5Gy IR treatment. **B**,  
481 Quantification of RAD51 in A. More than 10 RAD51 foci were counted. n=3 biologically  
482 independent experiments, \*\*\*P < 0.0001. Statistical analysis was performed using two-tailed  
483 student's t-tests. **C**, Representative images of p-RPA32(S33) foci formation in wild-type and  
484 *REV7*<sup>-/-</sup> U2OS cells treated with siRNA negative control (siNC) and siCHAMP1, and 6 hours  
485 after 5 Gy IR treatment. **D**, Quantification of p-RPA32(S33) foci in C. More than 10 RAD51 foci  
486 were counted. n=3 biologically independent experiments, \*\*\*P < 0.0001. Statistical analysis was

487 performed using two-tailed student's t-tests. **E**, (left) A 14-days clonogenic survival of wild-type  
488 and REV7<sup>-/-</sup> U2OS cells treated with various doses of Olaparib after siControl or siCHAMP1  
489 treatment. n=3 independent experiments, \*\*P < 0.001, \*\*\*P < 0.0001. Statistical analysis was  
490 performed using two-way ANOVA. (right) A cartoon shows that CHAMP1 inhibits REV7 to  
491 promote HR.

492

493 **Fig 6. CAMP overexpression is common in tumors with underlying HR deficiency and**  
494 **correlates with poor cancer patient prognosis**

495 **A**, Schematic of PARPi-resistant RPE1<sup>p53<sup>-/-</sup>BRCA1<sup>-/-</sup></sup> cells generation. RPE1<sup>p53<sup>-/-</sup>BRCA1<sup>-/-</sup></sup> cells (B40)  
496 were treated with increasing concentrations of the PARPis niraparib/Olaparib over 3 months, and  
497 then isolated by single-cell clones from the niraparib- and Olaparib-resistant pools. **B**, A 14-days  
498 clonogenic survival of RPE1<sup>p53<sup>-/-</sup></sup>, RPE1<sup>p53<sup>-/-</sup>BRCA1<sup>-/-</sup></sup> and niraparib/Olaparib-resistant RPE1<sup>p53<sup>-/-</sup></sup>  
499 BRCA1<sup>-/-</sup> cell clones treated with various doses of Olaparib after siControl or siCHAMP1 treatment.  
500 n=3 independent experiments. \*\*\*P < 0.0001. Statistical analysis was performed using two-way  
501 ANOVA. **C-D**, Kaplan–Meier curves depicting overall survival of patients from TCGA with  
502 CHAMP1 expression and wildtype BRCA1 and BRCA2 (**C**), and mutated BRCA1 or BRCA2  
503 (**D**). This analysis combines tumors from these TCGA studies: BLCA (blader), BRCA (breast),  
504 LUAD (lung), LUSC (lung squamous), and SKCM (skin).  
505 **E**, CHAMP1 expression positively correlates with Cyclin E expression. **F**, Breast cancer cells  
506 with high expression of CCNE1 are more dependent on CHAMP1 for survival.

507

508 **Figure 7. POGZ is epistatic with CHAMP1 in the Regulation of Homologous**  
509 **Recombination**

510 **A**, Graph showing the percentage of GFP-positive cells after DR-GFP analysis. U2OS cells were  
511 infected with I-SceI adenovirus and knocked down for BRCA1 or POGZ using siRNA. N=3  
512 biologically independent experiments. Error bars indicate standard errors, and p values were  
513 calculated using two-tailed Student t-test, \*\*\*P<0.0001. **B**, Quantification of resected ssDNA  
514 measured by SMART assay in U2OS cells treated by siControl or siRNAs targeting CHAMP1  
515 for 48hrs. Approximately 50 fibers were counted per experiment. Error bars indicate standard  
516 errors, and p values were calculated using Student t-test, \*\*\*P<0.0001. **C**, Quantification of >10  
517 RAD51 foci in wild-type and two CHAMP1 knockout U2OS cell lines 6 hours after 5Gy IR  
518 treatment. n=3 biologically independent experiments. \*\*\*P < 0.001. Statistical analysis was  
519 performed using two-tailed student's t-tests. **D**, Western blot showing GFP-immunoprecipitation  
520 of GFP-REV7 in HEK293T cells treated with or without irradiation (5Gy), and the co-  
521 immunoprecipitation of endogenous CHAMP1 and POGZ. **E**, Western blot showing GFP-  
522 immunoprecipitation of GFP-CHAMP1 in HEK293T cells treated with or without siPOGZ, and  
523 the co-immunoprecipitation of endogenous CHAMP1 and POGZ. **F**, 3-day cytotoxicity analysis  
524 of RPE1<sup>p53-/-</sup> and RPE1<sup>p53-/-CHAMP1-/-</sup> cells treated with various doses of Olaparib after 48 hours  
525 siControl or siPOGZ treatment. Cell viability were detected by CellTiter-Glo (Promega), n=3  
526 independent experiments. Statistical analysis was performed using two-way ANOVA. **G**, 3-day  
527 cytotoxicity analysis of RPE1<sup>p53-/-</sup> and RPE1<sup>p53-/-POGZ-/-</sup> cells treated with various doses of  
528 Olaparib after 48 hours siControl or siCHAMP1 treatment. Cell viability were detected by  
529 CellTiter-Glo (Promega), n=3 independent experiments. Statistical analysis was performed using  
530 two-way ANOVA. All of the immunoblots are representative of at least two independent  
531 experiments.

532

533

534 **Materials and Methods**

535 **Cell culture and transfections**

536 Human U2OS, RPE1-hTERT, HCC1937 and HEK293T cells were cultured in DMEM/F12 +  
537 Glutamax (Invitrogen) supplemented with 10% FBS (Sigma) and 1% penicillin-streptomycin  
538 (Invitrogen). DNA transfections and siRNA knockdowns were carried out using Lipofectamine  
539 LTX (Invitrogen) and RNAiMax (Invitrogen) respectively according to the manufacturer's  
540 protocols. The individual siRNAs used are: AllStar negative siControl (1027281); siCHAMP1 #4  
541 (SI00973084); siCHAMP1 #8 (SI04282159); siBRCA1 (SI00930510); si53BP1 (SI01456539)  
542 were purchased from Qiagen. ON-target Human siPOGZ (L-006953-01-0005) were purchased  
543 from Horizon Discovery.

544 **Antibodies and chemicals**

545 Antibodies used in this study were: Abnova H00283489-B01P (C13orf8/CHAMP1, IB, IF),  
546 Abcam ab180579 (Mad2L2/REV7, IB, IF), Bethyl Laboratories A302-509A (POGZ, IB, IF),  
547 Abcam ab128171 (TRIP13, IB), Cell Signaling 3873 (alpha-Tubulin, IF), Cell Signaling 2187  
548 (Phospho-CENP-A, IF), Cell Signaling 3638 (H3, IB), Cell Signaling 2956 (GFP, IB), Cell  
549 Signaling 3700 (Actin, IB), Abcam ab70369 (phospho-Kap1-S824, IB), Cell Signaling 6966  
550 (Phospho-[S/T]Q, IB), Fisher Scientific NB100544 (RPA2-P-Ser33, IF), Santa Cruz sc-8349  
551 (RAD51, IF), Millipore-Sigma F3165 (GAPDH, IB) and Millipore-Sigma F3165 (Flag, IB, IF).  
552 Mitomycin C (MMC) was purchased from Sigma and Olaparib was purchased from Selleckchem.

553 **Generation of knockout cell lines with CRISPR-Cas9**

554 CHAMP1 and POGZ guide RNA sequences were cloned into the pSpCas9 BB-2A-GFP (PX458)  
555 vector (GenScript). U2OS and RPE1<sup>p53<sup>-/-</sup></sup> cells were transfected with Cas9-gRNA plasmids.  
556 After 48 hours GFP positive cells were selected using a BD FACSAria II cell sorter. Single cells



557 from GFP positive pool were cultured for three to four weeks and colonies were screened for  
558 knockouts by western blotting using the anti-p31<sup>comet</sup> antibody (Millipore-Sigma). The guide  
559 RNA sequences targeting CHAMP1 in this study were: #1 TCGTAAACCATCAGCACGTT and  
560 #2 CCAGAGATCCGTAGTCCAGC. The guide RNA sequences targeting POGZ in this study  
561 were: #1 CAGTTTGTTAAGCCGACAGT and #2 TCTGCTGATCGAGTTCTACG.

### 562 **GFP-based DNA Repair Assays**

563 For DR- and EJ5-GFP reporter assays, U2OS cells carrying the respective GFP expression  
564 cassette were transfected with the indicated siRNAs. 24 hours after transfection, cells were  
565 infected with or without I-SceI lentivirus. After 48 hours, cells were harvested and detected by  
566 flow cytometry. The data was analyzed using the FlowJo software.

### 567 **Cellular fractionation and immunoblot analysis**

568 Cells were lysed with NP40 buffer (1% NP40, 300 mM NaCl, 0.1 mM EDTA, 50 mM Tris (pH  
569 7.5)) supplemented with phosphatase and protease inhibitor cocktail (Roche). Cell lysates were  
570 resolved by NuPAGE 4-12% Bis-Tris gels (Invitrogen), and transferred onto nitrocellulose  
571 membranes. Membranes were blocked with 5% BSA in TBST and were sequentially incubated  
572 with primary and secondary antibodies and detected using chemiluminescence or fluorescence  
573 (LI-COR Biosciences). For chromatin extraction, chromatin-bound extracts were got using  
574 subcellular protein fractionation kit (Thermo). The band intensities were measured by ImageJ.

### 575 **Immunoprecipitation**

576 After transfection for 48h, 293T or U2OS cells were then harvested and lysed in NETN lysis  
577 buffer with proteinase & phosphatase inhibitor cocktail (Thermo, 1:100) for 30 minutes on ice.  
578 They were then incubated with antibody-bead conjugate (Anti-FLAG® M2 Magnetic Beads,  
579 Millipore & Sigma or GFP-Trap\_A, Chromotek) overnight at 4 °C. Beads were washed four

580 times with NETN buffer and immunoprecipitates were eluted by boiling. Western blots were  
581 performed to detect the immunoprecipitates. The band intensities were measured by ImageJ.

### 582 **Drug sensitivity assays**

583 Cells were transfected with plasmid or siRNA 24h before being plated for colony formation or  
584 CellTiter-Glo assays. To assay clonogenic survival, cells were seeded at 500-1000 cells/well in  
585 6-well plates in triplicates. Drugs at the shown doses were added after 12 hours and cells were  
586 permitted to grow for 14 days. Colony formation was scored by fixing and staining with 0.5%  
587 (w/v) crystal violet in 20% methanol. For short term CellTiter-Glo survival assays, cells were  
588 plated in 96-well plates at 800-1000 cells/well, and treated with drugs at the indicated  
589 concentrations after 12 hours. Three days later, cellular viability was measured using CellTiter-  
590 Glo (Promega). Survival at each drug concentration was calculated as a percentage normalized to  
591 the corresponding untreated control, for both assays.

### 592 **Immunofluorescence assays**

593 Cells were plated on glass coverslips in 12-well plates. They were then either left untreated or  
594 treated at 20J/m<sup>2</sup> UV or 5Gy IR. After 1 or 6 hours, they were harvested by pre-extraction with  
595 0.5% Triton X-100 for 5 min, followed 4% paraformaldehyde fixation for 10 min at 4 °C. After  
596 three PBS washes, blocking was performed with 3% BSA in PBS for 1 hour at room temperature,  
597 followed by sequential primary and secondary antibody incubations overnight at 4 °C and 1 hour  
598 at room temperature respectively. The coverslips were mounted with DAPI (Vector  
599 Laboratories) and captured using a Zeiss AX10 fluorescence microscope and Zen software, and  
600 foci were scored. At least 100 cells were counted for each sample.

### 601 **SMART assay**

602 The SMART DNA fiber assay procedure was performed largely as described previously  
603 (Clairmont et al., 2020). In brief, cells were treated with BrdU (sigma) for 24h, and then exposed  
604 to X-ray irradiation to induce DSB formation. Cells were collected 6h after irradiation, and  
605 embedded in low melting point agarose plugs before lysis with proteinase K overnight at 50°C.  
606 The plugs were then washed with TE buffer and digested with agarase (NEB). The sample  
607 solution was spread onto silanized coverslips using the FiberComb machine (Genomic Vision).  
608 Combed coverslips were blocking with 3% BSA for 30min, and then incubated with anti-BrdU  
609 antibody (rat, abcam) overnight at 4°C. After incubation with secondary Alexa-555-labelled goat  
610 anti-rat antibodies, the coverslips were washed and mounted with Vectashield mounting medium  
611 (Vector laboratories). Images were captured by Zeiss AX10 fluorescence microscope. At least  
612 100 fibers were counted per condition. The fiber lengths were measured using imageJ and  
613 graphed.

#### 614 **Chromosomal aberration analysis**

615 RPE1<sup>p53<sup>-/-</sup></sup> and RPE1<sup>p53<sup>-/-</sup>CHAMP1<sup>-/-</sup></sup> cells were incubated with or without 20 ng/ml MMC for 48  
616 hours. Cells were treated with 100 ng/ml of colcemid for 2 hours, followed by a hypotonic  
617 solution (0.075 M KCl) for 20 min and fixed with 3:1 methanol/acetic acid. After staining with  
618 Wright's stain, 50 metaphase spreads were counted for aberrations. The relative number of  
619 chromosomal dicentrics and radials was calculated relative to control cells as indicated.

#### 620 **TCGA data acquisition and analysis**

621 The survival analyses of the Cancer Genome Atlas (TCGA) patients were performed using the  
622 clinical and RNASeq expression and genomic alteration data of TCGA Pan-Cancer study for 32  
623 cancer types downloaded from the cBioPortal for Cancer Genomics (<https://www.cbioportal.org>;  
624 retrieved March 2020). For the survival analysis with mRNA expression of CHAMP1

625 (CHAMP1) and REV7 (MAD2L2), for each cancer type, samples were grouped into the low-  
626 and high-mRNA expressing groups for CHAMP1 and REV7 based on the expression z-scores of  
627 either zero, or less than -0.5 and greater than 0.5. These expression z-scores were computed  
628 relative to the diploid samples. Survival analysis was then performed in R for each cancer type  
629 to determine whether there was a difference in the overall survival between the two groups,  
630 separately for CHAMP1 and REV7, and for REV7 in each of the two CHAMP1 groups. Kaplan-  
631 Meier curves were created, and the log-rank test was used to test for a difference in overall  
632 survival using the survival package in R. The p values were calculated from the chi-square  
633 distribution. The survminer R package was used to estimate median survivals, and to plot the  
634 Kaplan-Meier curves. Additionally, Cox proportional hazards regression was performed to  
635 estimate the hazard ratio between the low- and the high-mRNA groups for each cancer type.

636 The survival analyses of TCGA patients with CHAMP1 mRNA expression and mutation  
637 status of BRCA1 and BRCA2 were performed as follows. A tumor was considered mutated for a  
638 gene if it had variants with classifications that were damaging or other non-conserving. The  
639 analyses were first performed for each cancer type and independently with mutation status of  
640 BRCA1 and BRCA2. Then the cancer types that showed a trend from the results with either gene  
641 were selected for the combined analysis. The combined survival analysis with CHAMP1  
642 expression and mutation status of BRCA1 and BRCA2 was performed with tumors being  
643 considered mutated if they had a mutated status for either BRCA1 or BRCA2. Also, the Cox  
644 proportional hazards regression was performed with accounting for the differences between  
645 cancer types and between tumor stages.

646 **Cancer cell lines' data acquisition and analysis**

647 The association analyses between cyclin E (CCNE1) expression and CHAMP1 dependency  
648 and CHAMP1 expression in cancer cell lines were performed using the expression data from the  
649 Cancer Cell Line Encyclopedia (CCLE) project (Ghandi et al., 2019) and the dependency data  
650 from the Broad Institute Cancer Dependency Map (DepMap; CRISPR DepMap Public 19Q4  
651 dataset) (Meyers et al., 2017). Both datasets were downloaded from the DepMap Portal  
652 (<https://depmap.org/portal/>). The RNASeq expression counts were normalized by the TMM  
653 (weighted trimmed mean of M-values) method using the edgeR package (Robinson et al., 2010)  
654 and transformed into log<sub>2</sub>-counts per million (log<sub>2</sub>-CPM) values. For each cancer lineage, the  
655 low- and high-cyclin E mRNA expressing groups were determined using the median log<sub>2</sub>-CPM.  
656 The significance of the difference in the CHAMP1 dependency between the low- and high-cyclin  
657 E mRNA groups were assessed by the Wilcoxon rank sum test using the ggpubr R package. The  
658 correlation between CHAMP1 mRNA expression and cyclin E mRNA expression were  
659 performed by the simple linear regression on the log<sub>2</sub>-CPM values using the ggpmisc R package.  
660 The plots were generated using the ggplot2 package in R.

661

662

663 **REFERENCES**

- 664
- 665 Barazas, M., Annunziato, S., Pettitt, S.J., de Krijger, I., Ghezraoui, H., Roobol, S.J., Lutz, C.,  
666 Frankum, J., Song, F.F., Brough, R., *et al.* (2018). The CST Complex Mediates End Protection at  
667 Double-Strand Breaks and Promotes PARP Inhibitor Sensitivity in BRCA1-Deficient Cells. *Cell*  
668 *Rep* 23, 2107-2118.
- 669 Baude, A., Aaes, T.L., Zhai, B., Al-Nakouzi, N., Oo, H.Z., Daugaard, M., Rohde, M., and  
670 Jaattela, M. (2016). Hepatoma-derived growth factor-related protein 2 promotes DNA repair by  
671 homologous recombination. *Nucleic Acids Res* 44, 2214-2226.
- 672 Bluteau, D., Masliah-Planchon, J., Clairmont, C., Rousseau, A., Ceccaldi, R., Dubois d'Enghien,  
673 C., Bluteau, O., Cucchini, W., Gachet, S., Peffault de Latour, R., *et al.* (2016). Biallelic  
674 inactivation of REV7 is associated with Fanconi anemia. *J Clin Invest* 126, 3580-3584.
- 675 Boersma, V., Moatti, N., Segura-Bayona, S., Peuscher, M.H., van der Torre, J., Wevers, B.A.,  
676 Orthwein, A., Durocher, D., and Jacobs, J.J.L. (2015). MAD2L2 controls DNA repair at  
677 telomeres and DNA breaks by inhibiting 5' end resection. *Nature* 521, 537-540.
- 678 Brulotte, M.L., Jeong, B.C., Li, F., Li, B., Yu, E.B., Wu, Q., Brautigam, C.A., Yu, H., and Luo,  
679 X. (2017). Mechanistic insight into TRIP13-catalyzed Mad2 structural transition and spindle  
680 checkpoint silencing. *Nat Commun* 8, 1956.
- 681 Bryant, H.E., Schultz, N., Thomas, H.D., Parker, K.M., Flower, D., Lopez, E., Kyle, S., Meuth,  
682 M., Curtin, N.J., and Helleday, T. (2005). Specific killing of BRCA2-deficient tumours with  
683 inhibitors of poly(ADP-ribose) polymerase. *Nature* 434, 913-917.
- 684 Clairmont, C.S., and D'Andrea, A.D. (2021). REV7 directs DNA repair pathway choice. *Trends*  
685 *Cell Biol.*
- 686 Clairmont, C.S., Sarangi, P., Ponnienselvan, K., Galli, L.D., Csete, I., Moreau, L., Adelmant, G.,  
687 Chowdhury, D., Marto, J.A., and D'Andrea, A.D. (2020). TRIP13 regulates DNA repair pathway  
688 choice through REV7 conformational change. *Nat Cell Biol* 22, 87-96.
- 689 Daugaard, M., Baude, A., Fugger, K., Povlsen, L.K., Beck, H., Sorensen, C.S., Petersen, N.H.,  
690 Sorensen, P.H., Lukas, C., Bartek, J., *et al.* (2012). LEDGF (p75) promotes DNA-end resection  
691 and homologous recombination. *Nat Struct Mol Biol* 19, 803-810.
- 692 de Krijger, I., Boersma, V., and Jacobs, J.J.L. (2021a). REV7: Jack of many trades. *Trends Cell*  
693 *Biol.*
- 694 de Krijger, I., Fohr, B., Perez, S.H., Vincendeau, E., Serrat, J., Thouin, A.M., Susvirkar, V.,  
695 Lescale, C., Paniagua, I., Hoekman, L., *et al.* (2021b). MAD2L2 dimerization and TRIP13  
696 control shieldin activity in DNA repair. *Nat Commun* 12, 5421.
- 697 Dev, H., Chiang, T.W., Lescale, C., de Krijger, I., Martin, A.G., Pilger, D., Coates, J.,  
698 Sczaniecka-Clift, M., Wei, W., Ostermaier, M., *et al.* (2018). Shieldin complex promotes DNA  
699 end-joining and counters homologous recombination in BRCA1-null cells. *Nat Cell Biol* 20,  
700 954-965.
- 701 Farkkila, A., Rodriguez, A., Oikkonen, J., Gulhan, D.C., Nguyen, H., Dominguez, J., Ramos, S.,  
702 Mills, C.E., Perez-Villatoro, F., Lazaro, J.B., *et al.* (2021). Heterogeneity and Clonal Evolution  
703 of Acquired PARP Inhibitor Resistance in TP53- and BRCA1-Deficient Cells. *Cancer Res* 81,  
704 2774-2787.
- 705 Farmer, H., McCabe, N., Lord, C.J., Tutt, A.N., Johnson, D.A., Richardson, T.B., Santarosa, M.,  
706 Dillon, K.J., Hickson, I., Knights, C., *et al.* (2005). Targeting the DNA repair defect in BRCA  
707 mutant cells as a therapeutic strategy. *Nature* 434, 917-921.

708 Findlay, S., Heath, J., Luo, V.M., Malina, A., Morin, T., Coulombe, Y., Djerir, B., Li, Z., Samiei,  
709 A., Simo-Cheyrou, E., *et al.* (2018). SHLD2/FAM35A co-operates with REV7 to coordinate  
710 DNA double-strand break repair pathway choice. *EMBO J* 37.  
711 Gao, S., Feng, S., Ning, S., Liu, J., Zhao, H., Xu, Y., Shang, J., Li, K., Li, Q., Guo, R., *et al.*  
712 (2018). An OB-fold complex controls the repair pathways for DNA double-strand breaks. *Nat*  
713 *Commun* 9, 3925.  
714 Ghandi, M., Huang, F.W., Jane-Valbuena, J., Kryukov, G.V., Lo, C.C., McDonald, E.R., 3rd,  
715 Barretina, J., Gelfand, E.T., Bielski, C.M., Li, H., *et al.* (2019). Next-generation characterization  
716 of the Cancer Cell Line Encyclopedia. *Nature* 569, 503-508.  
717 Ghezraoui, H., Oliveira, C., Becker, J.R., Bilham, K., Moralli, D., Anzilotti, C., Fischer, R.,  
718 Deobagkar-Lele, M., Sanchiz-Calvo, M., Fueyo-Marcos, E., *et al.* (2018). 53BP1 cooperation  
719 with the REV7-shieldin complex underpins DNA structure-specific NHEJ. *Nature* 560, 122-127.  
720 Gibbs, P.E., Wang, X.D., Li, Z., McManus, T.P., McGregor, W.G., Lawrence, C.W., and Maher,  
721 V.M. (2000). The function of the human homolog of *Saccharomyces cerevisiae* REV1 is  
722 required for mutagenesis induced by UV light. *Proc Natl Acad Sci U S A* 97, 4186-4191.  
723 Goodman, M.F., and Woodgate, R. (2013). Translesion DNA polymerases. *Cold Spring Harb*  
724 *Perspect Biol* 5, a010363.  
725 Gupta, R., Somyajit, K., Narita, T., Maskey, E., Stanlie, A., Kremer, M., Typas, D., Lammers,  
726 M., Mailand, N., Nussenzweig, A., *et al.* (2018). DNA Repair Network Analysis Reveals  
727 Shieldin as a Key Regulator of NHEJ and PARP Inhibitor Sensitivity. *Cell* 173, 972-988 e923.  
728 Hara, K., Hashimoto, H., Murakumo, Y., Kobayashi, S., Kogame, T., Unzai, S., Akashi, S.,  
729 Takeda, S., Shimizu, T., and Sato, M. (2010). Crystal structure of human REV7 in complex with  
730 a human REV3 fragment and structural implication of the interaction between DNA polymerase  
731 zeta and REV1. *J Biol Chem* 285, 12299-12307.  
732 Hara, K., Taharazako, S., Ikeda, M., Fujita, H., Mikami, Y., Kikuchi, S., Hishiki, A., Yokoyama,  
733 H., Ishikawa, Y., Kanno, S.I., *et al.* (2017). Dynamic feature of mitotic arrest deficient 2-like  
734 protein 2 (MAD2L2) and structural basis for its interaction with chromosome alignment-  
735 maintaining phosphoprotein (CAMP). *J Biol Chem* 292, 17658-17667.  
736 Huertas, P., and Cruz-Garcia, A. (2018). Single Molecule Analysis of Resection Tracks.  
737 *Methods Mol Biol* 1672, 147-154.  
738 Isidor, B., Kury, S., Rosenfeld, J.A., Besnard, T., Schmitt, S., Joss, S., Davies, S.J., Lebel, R.R.,  
739 Henderson, A., Schaaf, C.P., *et al.* (2016). De Novo Truncating Mutations in the Kinetocho-  
740 Microtubules Attachment Gene CHAMP1 Cause Syndromic Intellectual Disability. *Hum Mutat*  
741 37, 354-358.  
742 Itoh, G., Kanno, S., Uchida, K.S., Chiba, S., Sugino, S., Watanabe, K., Mizuno, K., Yasui, A.,  
743 Hirota, T., and Tanaka, K. (2011). CAMP (C13orf8, ZNF828) is a novel regulator of  
744 kinetocho-microtubule attachment. *EMBO J* 30, 130-144.  
745 Jansen, J.G., Tsaalbi-Shtylik, A., Langerak, P., Calleja, F., Meijers, C.M., Jacobs, H., and de  
746 Wind, N. (2005). The BRCT domain of mammalian Rev1 is involved in regulating DNA  
747 translesion synthesis. *Nucleic Acids Res* 33, 356-365.  
748 Matsuoka, S., Ballif, B.A., Smogorzewska, A., McDonald, E.R., 3rd, Hurov, K.E., Luo, J.,  
749 Bakalarski, C.E., Zhao, Z., Solimini, N., Lerenthal, Y., *et al.* (2007). ATM and ATR substrate  
750 analysis reveals extensive protein networks responsive to DNA damage. *Science* 316, 1160-1166.  
751 Meyers, R.M., Bryan, J.G., McFarland, J.M., Weir, B.A., Sizemore, A.E., Xu, H., Dharia, N.V.,  
752 Montgomery, P.G., Cowley, G.S., Pantel, S., *et al.* (2017). Computational correction of copy

753 number effect improves specificity of CRISPR-Cas9 essentiality screens in cancer cells. *Nat*  
754 *Genet* *49*, 1779-1784.

755 Miniowitz-Shemtov, S., Eytan, E., Kaisari, S., Sitry-Shevah, D., and Hershko, A. (2015). Mode  
756 of interaction of TRIP13 AAA-ATPase with the Mad2-binding protein p31comet and with  
757 mitotic checkpoint complexes. *Proc Natl Acad Sci U S A* *112*, 11536-11540.

758 Mirman, Z., Lottersberger, F., Takai, H., Kibe, T., Gong, Y., Takai, K., Bianchi, A.,  
759 Zimmermann, M., Durocher, D., and de Lange, T. (2018). 53BP1-RIF1-shieldin counteracts  
760 DSB resection through CST- and Polalpha-dependent fill-in. *Nature* *560*, 112-116.

761 Noordermeer, S.M., Adam, S., Setiাপutra, D., Barazas, M., Pettitt, S.J., Ling, A.K., Olivieri, M.,  
762 Alvarez-Quilon, A., Moatti, N., Zimmermann, M., *et al.* (2018). The shieldin complex mediates  
763 53BP1-dependent DNA repair. *Nature* *560*, 117-121.

764 Nozawa, R.S., Nagao, K., Masuda, H.T., Iwasaki, O., Hirota, T., Nozaki, N., Kimura, H., and  
765 Obuse, C. (2010). Human POGZ modulates dissociation of HP1alpha from mitotic chromosome  
766 arms through Aurora B activation. *Nat Cell Biol* *12*, 719-727.

767 Olivieri, M., Cho, T., Alvarez-Quilon, A., Li, K., Schellenberg, M.J., Zimmermann, M., Hustedt,  
768 N., Rossi, S.E., Adam, S., Melo, H., *et al.* (2020). A Genetic Map of the Response to DNA  
769 Damage in Human Cells. *Cell* *182*, 481-496 e421.

770 Pierce, A.J., Johnson, R.D., Thompson, L.H., and Jasin, M. (1999). XRCC3 promotes homology-  
771 directed repair of DNA damage in mammalian cells. *Genes Dev* *13*, 2633-2638.

772 Robinson, M.D., McCarthy, D.J., and Smyth, G.K. (2010). edgeR: a Bioconductor package for  
773 differential expression analysis of digital gene expression data. *Bioinformatics* *26*, 139-140.

774 Sale, J.E. (2013). Translesion DNA synthesis and mutagenesis in eukaryotes. *Cold Spring Harb*  
775 *Perspect Biol* *5*, a012708.

776 Sarangi, P., Clairmont, C.S., Galli, L.D., Moreau, L.A., and D'Andrea, A.D. (2020). p31(comet)  
777 promotes homologous recombination by inactivating REV7 through the TRIP13 ATPase. *Proc*  
778 *Natl Acad Sci U S A* *117*, 26795-26803.

779 Soria, G., and Almouzni, G. (2013). Differential contribution of HP1 proteins to DNA end  
780 resection and homology-directed repair. *Cell Cycle* *12*, 422-429.

781 Stark, J.M., Pierce, A.J., Oh, J., Pastink, A., and Jasin, M. (2004). Genetic steps of mammalian  
782 homologous repair with distinct mutagenic consequences. *Mol Cell Biol* *24*, 9305-9316.

783 Symington, L.S. (2014). End resection at double-strand breaks: mechanism and regulation. *Cold*  
784 *Spring Harb Perspect Biol* *6*.

785 Tomida, J., Takata, K.I., Bhetawal, S., Person, M.D., Chao, H.P., Tang, D.G., and Wood, R.D.  
786 (2018). FAM35A associates with REV7 and modulates DNA damage responses of normal and  
787 BRCA1-defective cells. *EMBO J* *37*.

788 Vermeulen, M., Eberl, H.C., Matarese, F., Marks, H., Denissov, S., Butter, F., Lee, K.K., Olsen,  
789 J.V., Hyman, A.A., Stunnenberg, H.G., *et al.* (2010). Quantitative interaction proteomics and  
790 genome-wide profiling of epigenetic histone marks and their readers. *Cell* *142*, 967-980.

791 Xu, G., Chapman, J.R., Brandsma, I., Yuan, J., Mistrik, M., Bouwman, P., Bartkova, J., Gogola,  
792 E., Warmerdam, D., Barazas, M., *et al.* (2015). REV7 counteracts DNA double-strand break  
793 resection and affects PARP inhibition. *Nature* *521*, 541-544.

794 Ye, Q., Rosenberg, S.C., Moeller, A., Speir, J.A., Su, T.Y., and Corbett, K.D. (2015). TRIP13 is  
795 a protein-remodeling AAA+ ATPase that catalyzes MAD2 conformation switching. *Elife* *4*.

796



**Fig 1. REV7/CHAMP1 Complex promotes Homologous Recombination Repair**

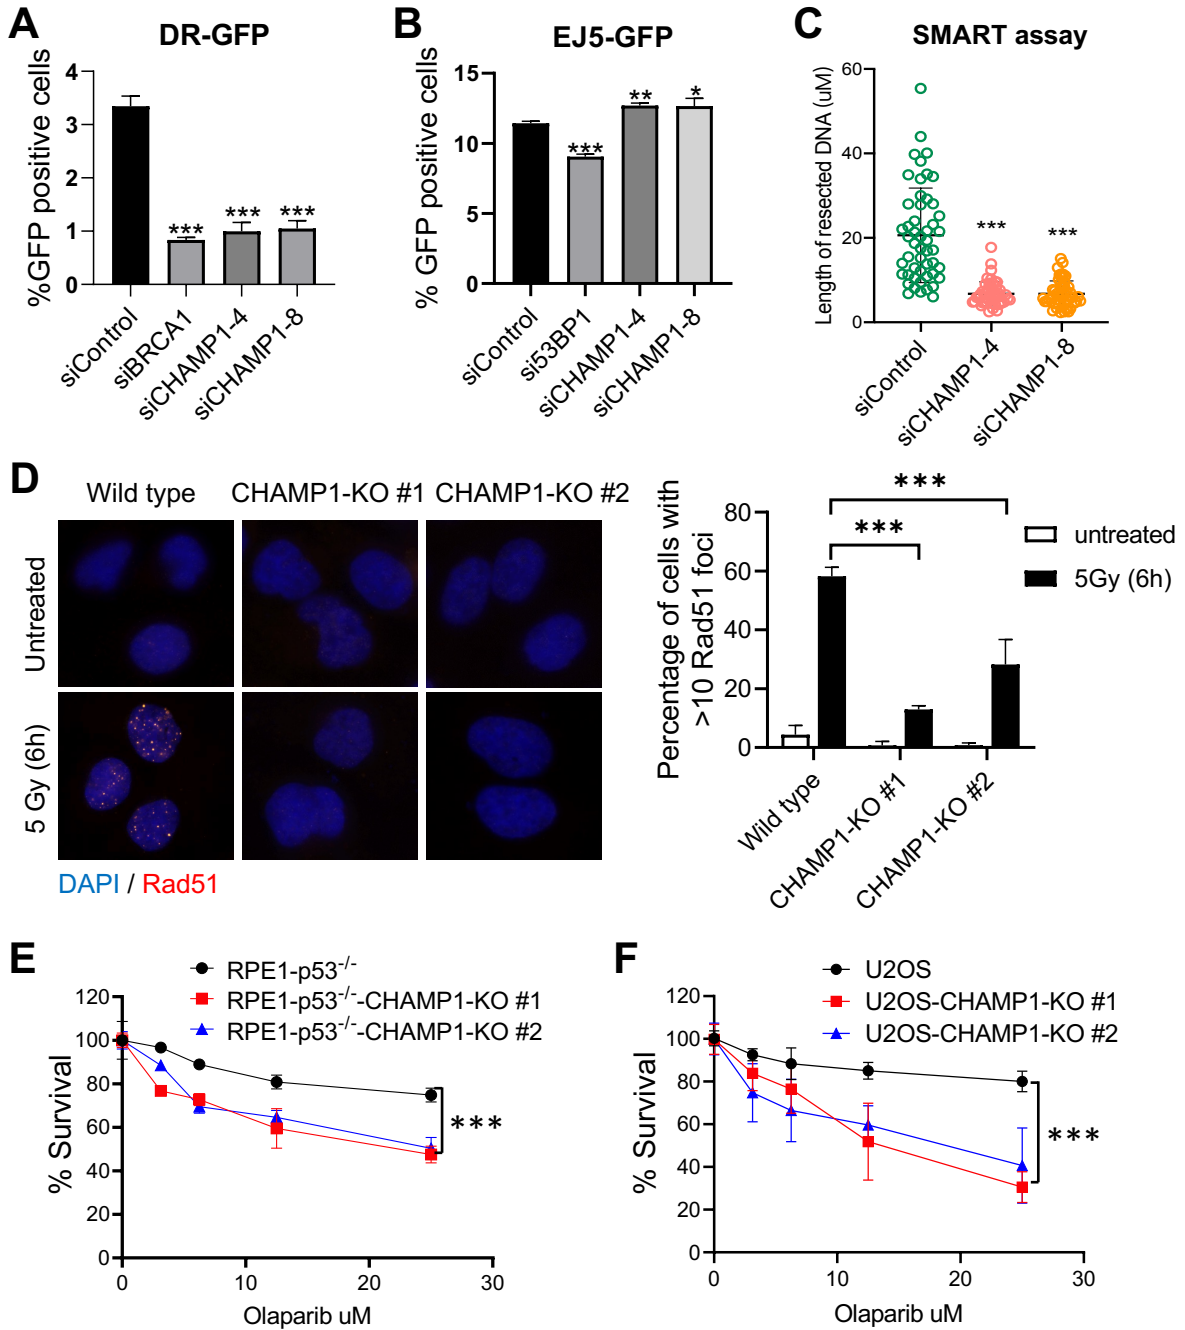



**Fig 3. CHAMP1 competes with SHLD3 and REV3 for binding to REV7**

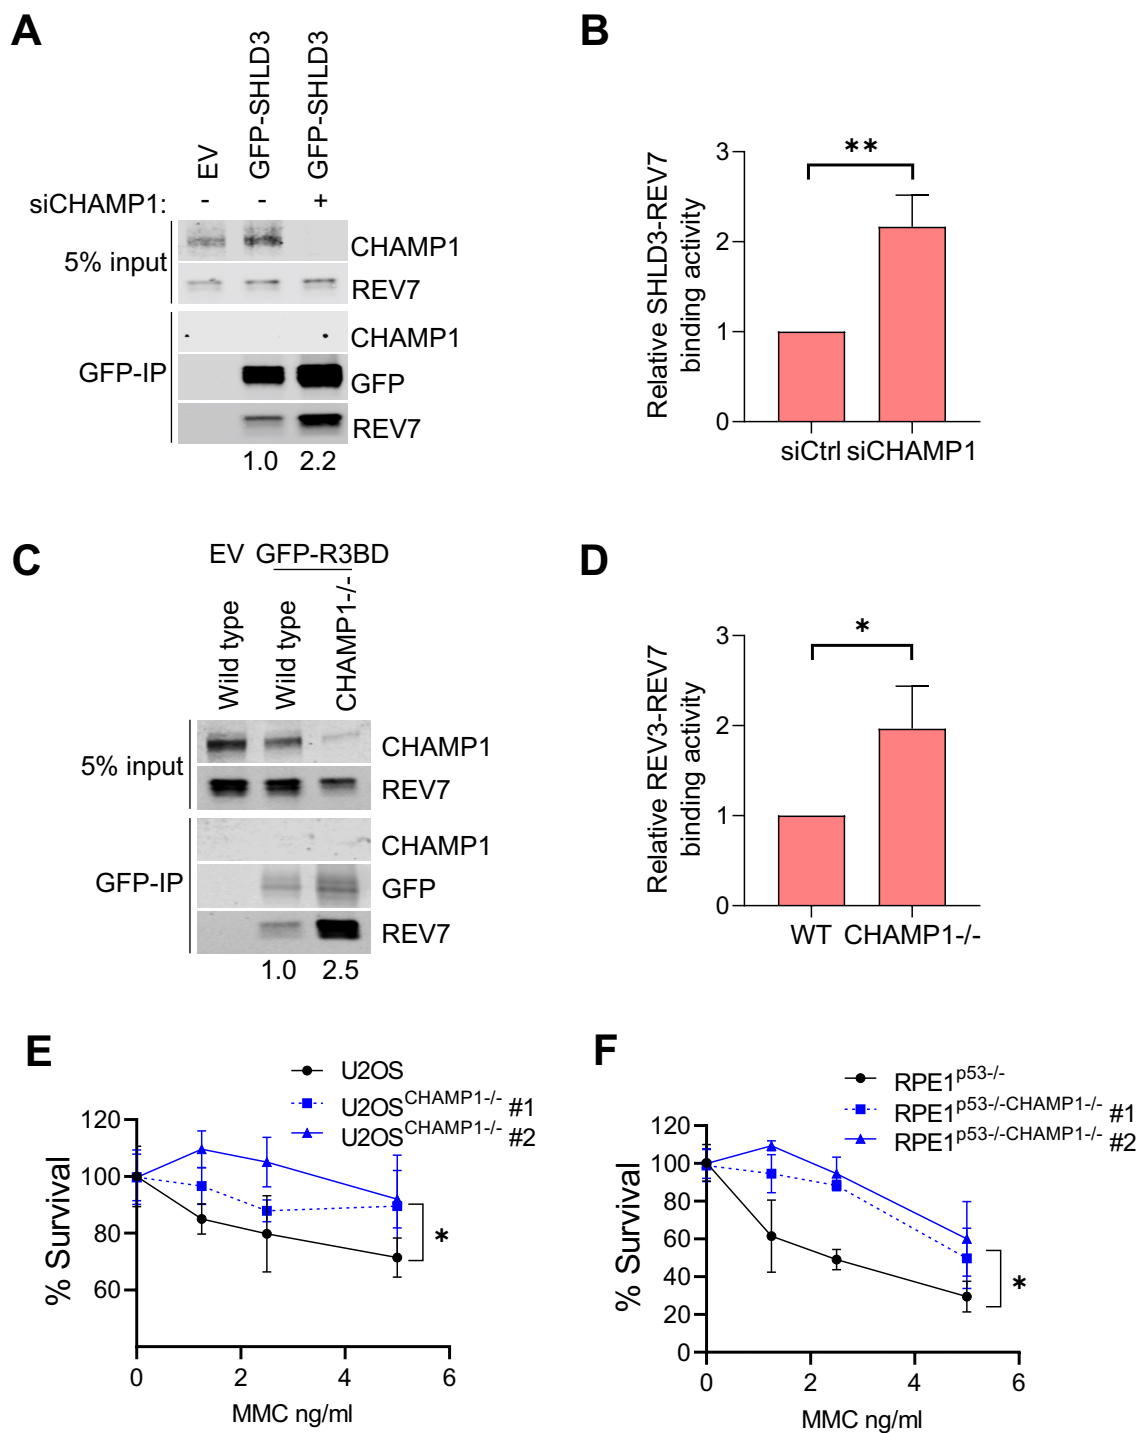

**Fig 4. The REV7 binding activity of CHAMP1 is not required for the CHAMP1 chromosome alignment function**

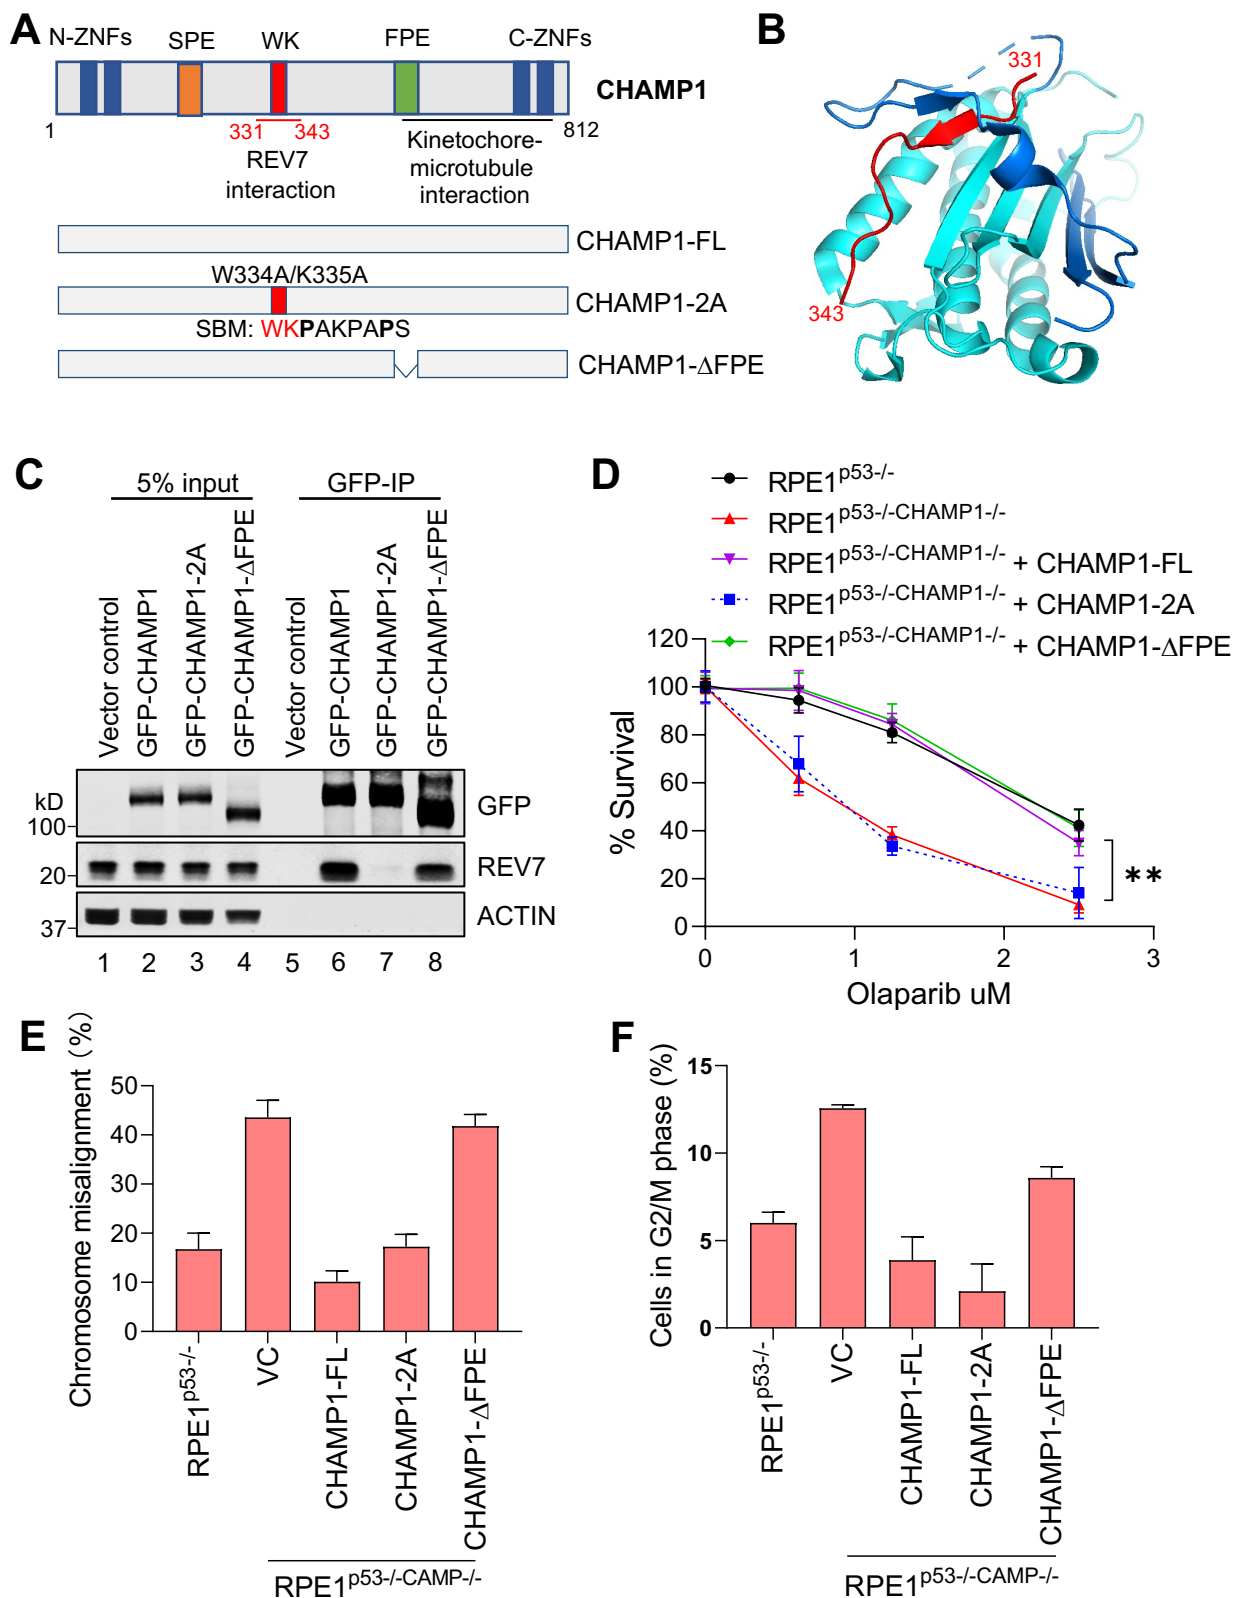

**Fig 5. CHAMP1 regulates HR through REV7**

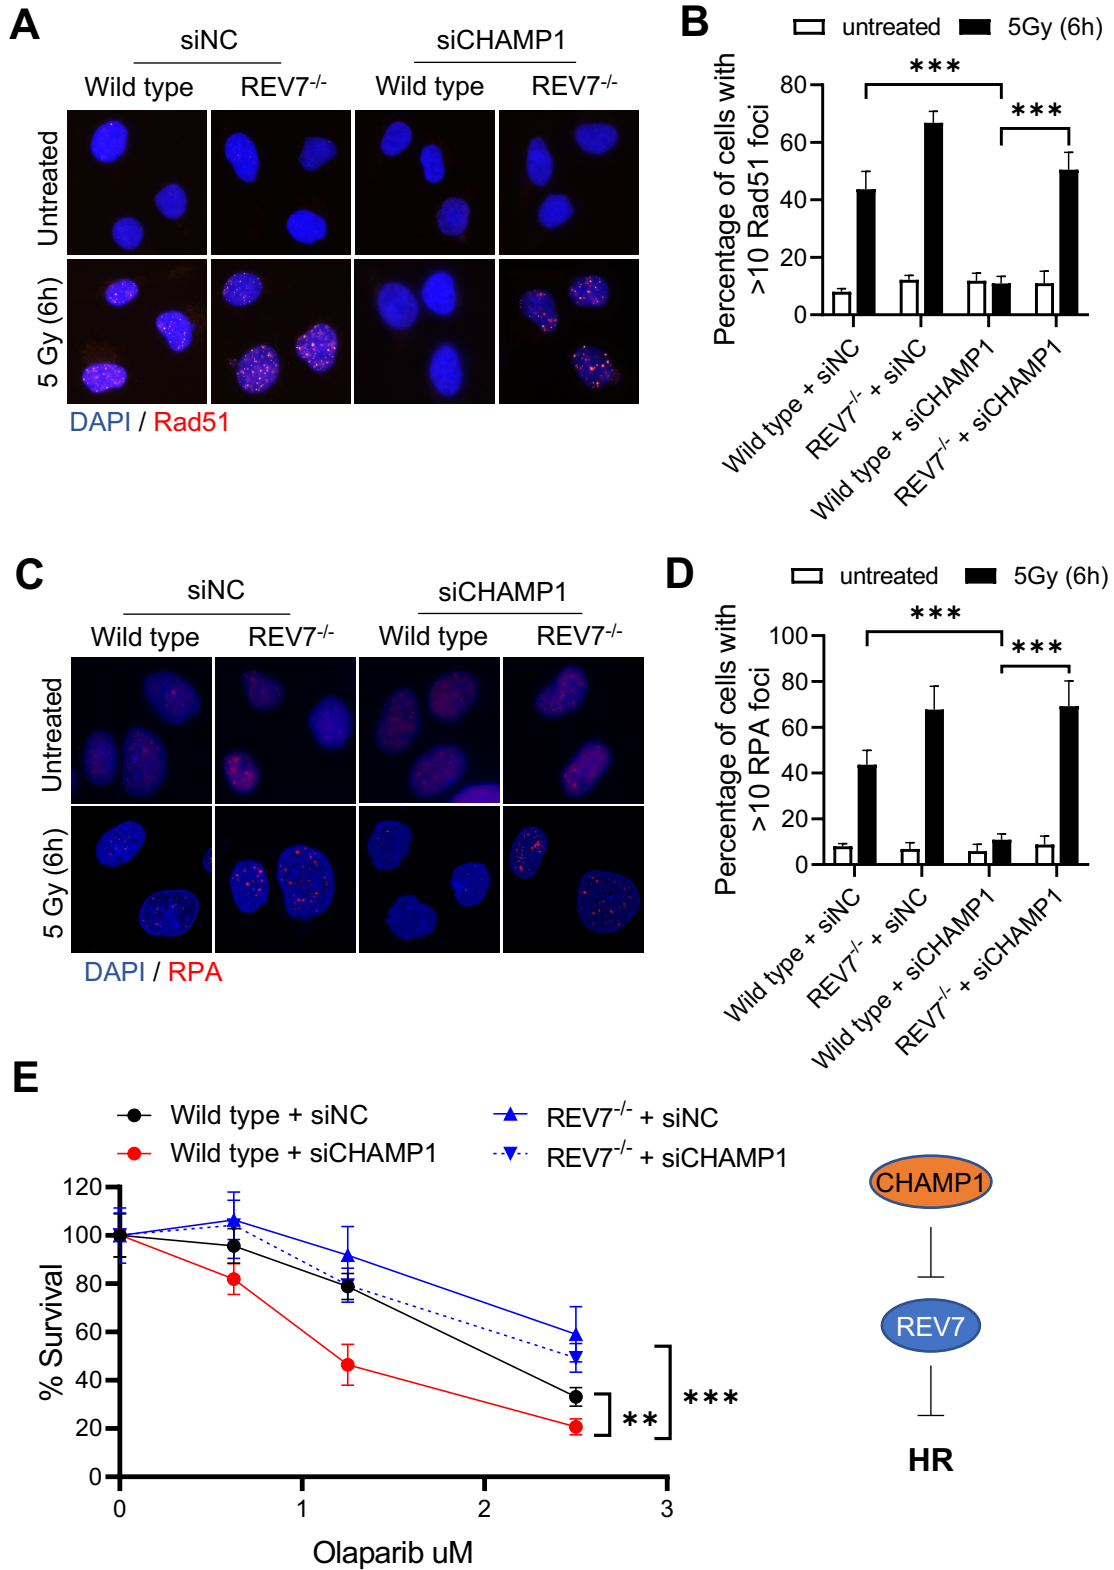

**Fig 6. CHAMP1 overexpression is common in tumors with underlying HR deficiency and correlates with poor cancer patient prognosis**

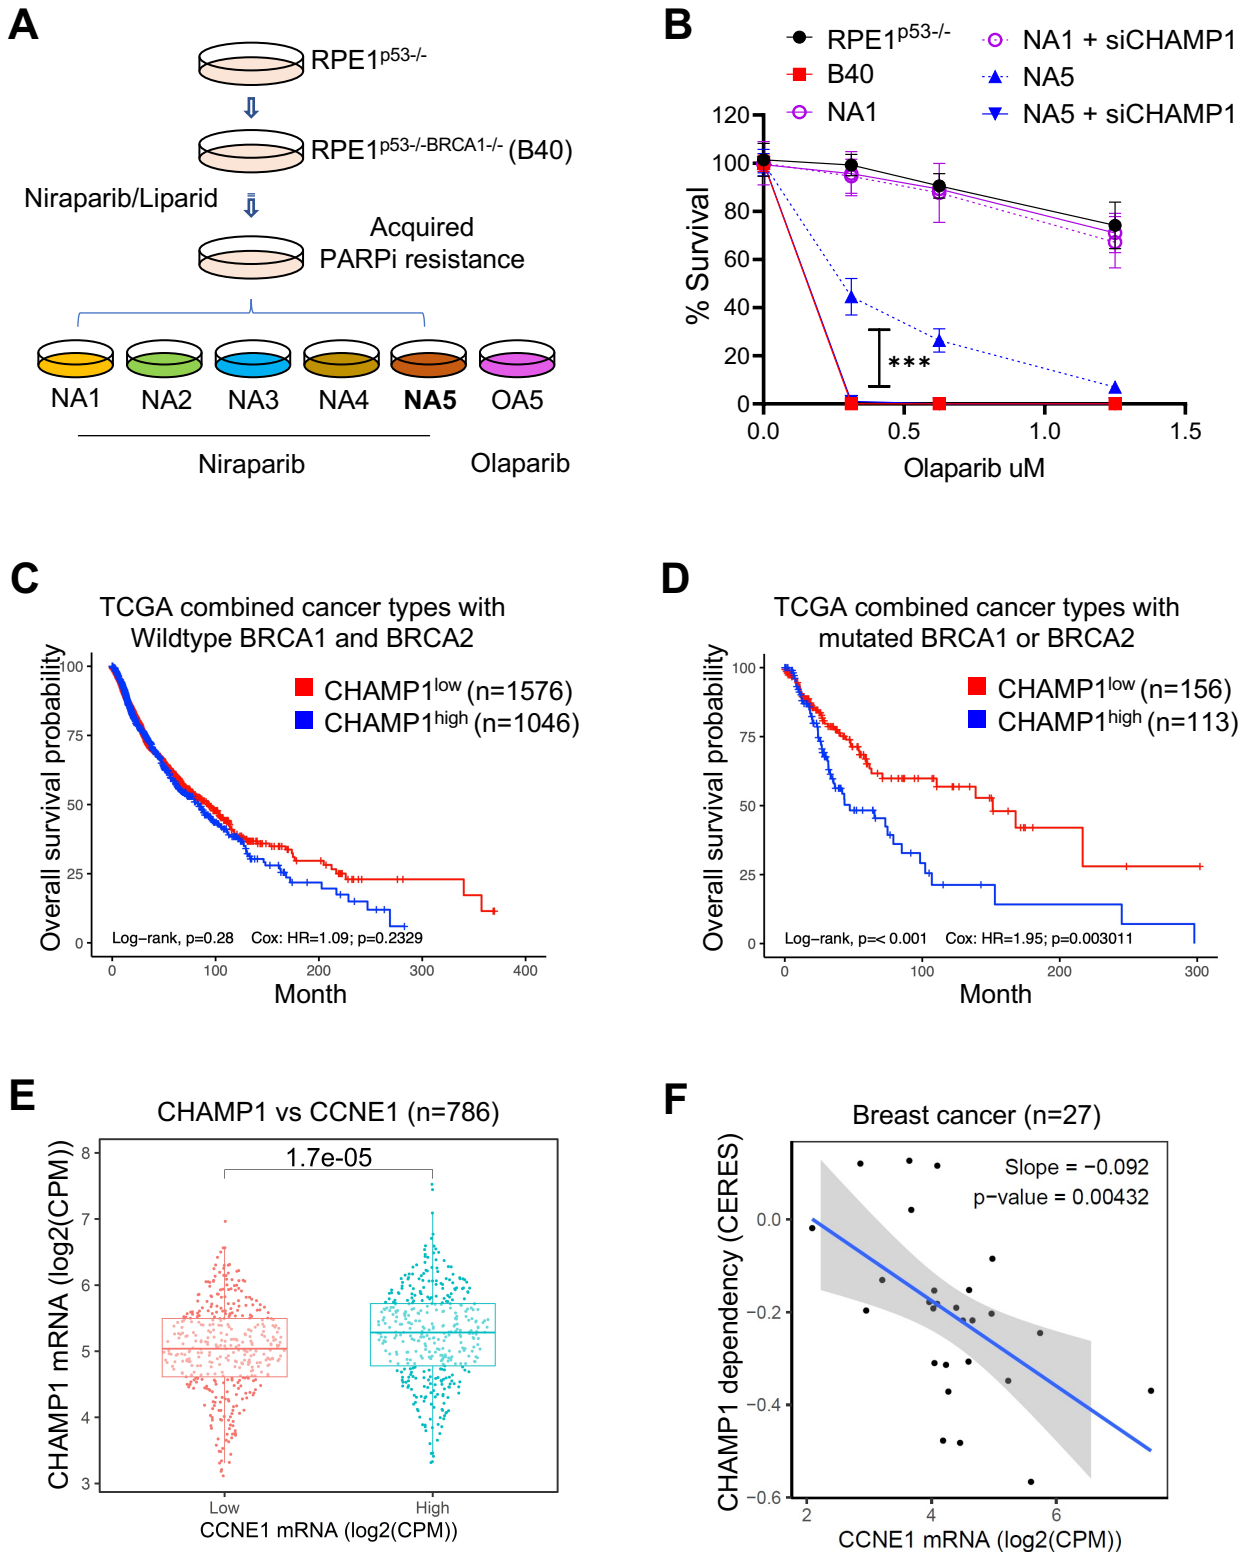

**Fig 7. POGZ is epistatic with CHAMP1 in Homologous Recombination**

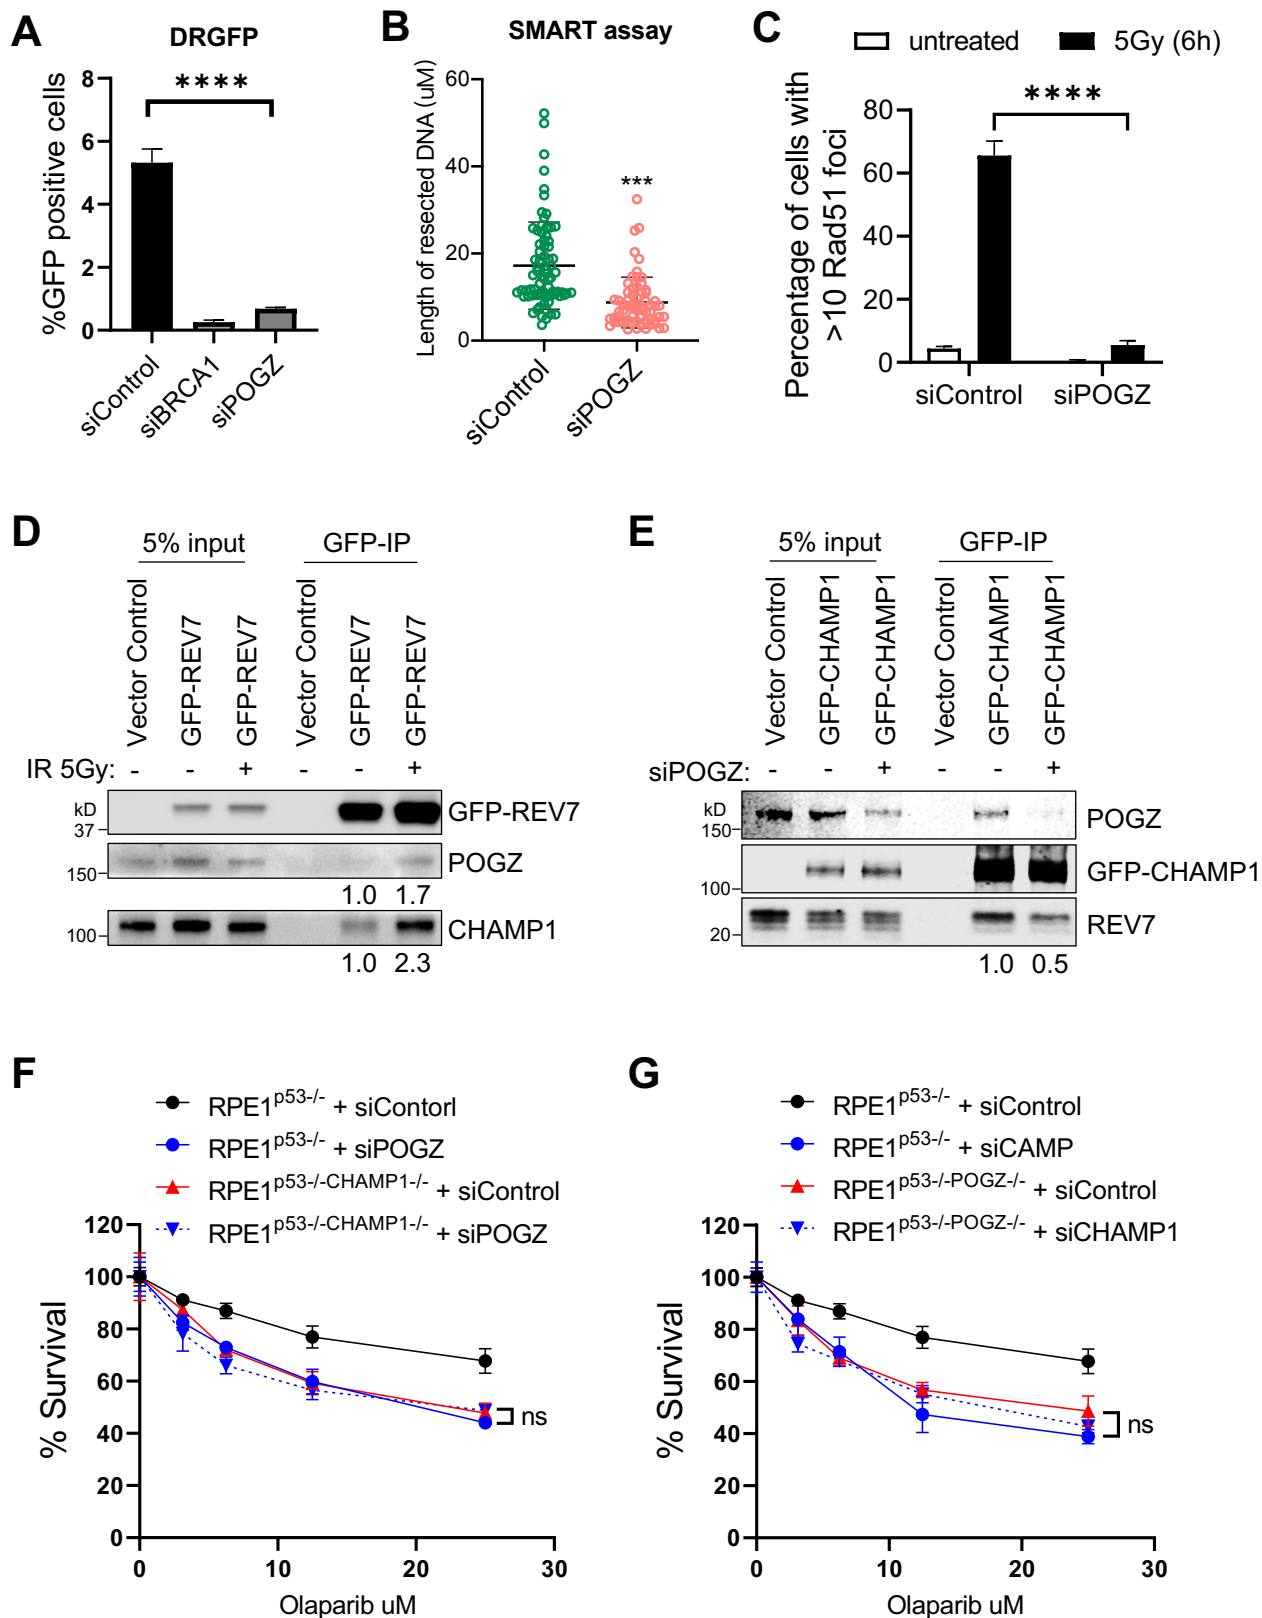

Source: https://www.biorxiv.org/content/biorxiv/early/2021/10/04/2021.10.04.463067.full.pdf
